# Supplementary material
Source: PubMed Central journal article supplement (PMC9247477)
Supplement: mmc1.pdf [file mmc1.pdf]

**Biophysical Journal, Volume 121**

**Supplemental information**

**Bacterial chemotaxis to saccharides is governed by a trade-off between sensing and uptake**

**Noele Norris, Uria Alcolombri, Johannes M. Keegstra, Yutaka Yawata, Filippo Menolascina, Emilio Frazzoli, Naomi M. Levine, Vicente I. Fernandez, and Roman Stocker**

1 **Bacterial chemotaxis to saccharides is governed**  
2 **by a trade-off between sensing and uptake**

3 **Supplemental Material**

4 Noele Norris, Uria Alcolombri, Johannes M. Keegstra, Yutaka Yawata,  
5 Filippo Menolascina, Emilio Frazzoli, Naomi M. Levine, Vicente I. Fernandez, Roman Stocker

6 **Supplemental Appendix 1: A maltose transport model**

7 To describe the rate of maltose uptake into the cytoplasm, we use an ABC transport model and  
8 Michaelis-Menten approximation of ABC transport that we previously derived (Norris et al. 2021).  
9 Because it has been shown in *E. coli* that the abundance of the maltose binding protein greatly exceeds  
10 the abundance of transporters (Boos and Shuman 1998), the Michaelis-Menten approximation is valid.  
11 Therefore, we take the concentration of complex of maltose bound to the maltose binding protein to  
12 be:

13 
$$[\text{L}:\text{BP}] \approx [\text{BP}]_{\text{total}} \frac{[\text{L}]_{\text{p}}}{K_{\text{BP}} + [\text{L}]_{\text{p}}}$$
 (A-1)  
14

15 where  $[\text{BP}]_{\text{total}}$  is the total concentration of maltose binding protein in the periplasm;  $[\text{L}]_{\text{p}}$  is the con-  
16 centration of free maltose in the periplasm; and  $K_{\text{BP}}$  is the dissociation constant of maltose and maltose  
17 binding-protein.

18 We take the uptake rate of maltose into the cytoplasm to be

19 
$$v_{\text{c}} \approx V_{\text{c}} \frac{[\text{BP}]_{\text{total}}}{K_{\text{c}} + [\text{BP}]_{\text{total}}} \frac{[\text{L}]_{\text{p}}}{\frac{K_{\text{c}}K_{\text{BP}}}{K_{\text{c}} + [\text{BP}]_{\text{total}}} + [\text{L}]_{\text{p}}}, \quad V_{\text{c}} = k_2[\text{T}]_{\text{total}},$$
 (A-2)  
20

21 where:  $V_{\text{c}}$  is the maximal cytoplasmic uptake rate;  $K_{\text{c}}$  is the dissociation constant of the bound maltose-  
22 maltose binding protein complex and the transport unit;  $k_2$  is the turnover rate of the membrane-bound  
23 transport unit; and  $[\text{T}]_{\text{total}}$  is the total concentration of transport units in the periplasm.

24 While transport into the cytoplasm is active and thus can occur against concentration gradients,  
25 transport into the periplasm via porins is diffusive. Thus, while the cytoplasmic uptake rate has the  
26 above form, the periplasmic uptake rate is better described by the following Michaelis-Menten equation

27 (Bosdriesz et al. 2018):

28 
$$v_p \approx V_p \frac{[L]_{\text{ext}} - [L]_p}{K_p + [L]_{\text{ext}} + [L]_p}, \quad (\text{A-3})$$

29 where  $K_p$  is the half-saturation constant of the specific porin; and  $V_p$  is the maximal rate of uptake,  
30 which is a function of the number of expressed porins.

31 At steady-state, the periplasmic transport rate ( $v_p$ ) must be equal to the cytoplasmic transport rate  
32 ( $v_c$ ). Thus, we equate the rates from Equations A-2 and A-3 to solve for  $[L]_p$  as a function of  $[L]_{\text{ext}}$ .

### 33 **A linear approximation**

34 Analysis of the form of  $[L:\text{BP}]$  as a function of  $[L]_{\text{ext}}$  for the obtained parameter fits (Figure 4)  
35 shows that, for  $[L]_{\text{ext}} \lesssim 5 \mu\text{M}$ ,  $[L:\text{BP}]$  can be very well approximated by:

36 
$$[L:\text{BP}] = \alpha [L]_{\text{ext}}, \quad \alpha = \frac{K_c V_p}{K_p V_c}. \quad (\text{A-4})$$

37 This analytical approximation can be obtained by assuming that  $[L]_p \ll [L]_{\text{ext}}$  and demonstrates that,  
38 in the micromolar regime, chemotactic response is independent of binding protein abundance (Figures  
39 S7 & S8) and only dependent on the ratio of porin abundance to transport unit abundance.

## 40 Supplemental Appendix 2: A chemotaxis model

41 To model the chemotactic response of *E. coli* in mixed gradients of maltose and methyl-aspartate,  
 42 we extend the Signaling Pathway-based *E. coli* Chemotaxis Simulator (SPECS; Jiang et al. 2010) to  
 43 incorporate: (i) the heterogeneous MWC model (Keymer et al. 2006; Mello and Tu 2005) to consider  
 44 the chemotactic response of cells to multiple chemoattractants; and (ii) our new sensing-and-transport  
 45 model of chemotaxis to maltose that takes into account the transport kinetics of maltose into and out  
 46 of the periplasm, as well as the indirect binding of maltose to the aspartate receptor via the maltose-  
 47 binding protein.

48 Analogous to the derivation of the MWC model presented by Tu (2013), we derive the free energy  
 49 difference between the active and inactive states of a receptor cluster. We assume that the receptors in  
 50 a cluster are either all active or all inactive. A single receptor has four possible states: active ( $a = 1$ )  
 51 or inactive ( $a = 0$ ) and bound ( $l = 1$ ) or vacant ( $l = 0$ ), with probability,  $P(a, l)$ , where:

$$52 \quad \frac{P(1, 0)}{P(0, 0)} = e^{-f_m(m)}, \quad \frac{P(0, 1)}{P(0, 0)} = C_I, \quad \text{and} \quad \frac{P(1, 1)}{P(1, 0)} = C_A, \quad (\text{A-5})$$

53 where  $C_I$  and  $C_A$  are functions that we derive below.

54 Because the expected activity level of a single receptor is  $\langle a \rangle_{\text{receptor}} = P(1, 0) + P(1, 1)$  and  
 55  $P(0, 0) + P(0, 1) + P(1, 0) + P(1, 1) = 1$ ,

$$56 \quad \langle a \rangle_{\text{receptor}} = \frac{e^{-f_m(m)} [1 + C_A]}{1 + C_I + e^{-f_m(m)} (1 + C_A)}. \quad (\text{A-6})$$

57 We define the free energy difference,  $\Delta f$ , such that  $\langle a \rangle_{\text{receptor}} = (1 + e^{-\Delta f})^{-1}$ . Thus,

$$58 \quad \Delta f = -f_m(m) - \log \left[ \frac{1 + C_I}{1 + C_A} \right]. \quad (\text{A-7})$$

59 Because we assume that all of the  $n$  receptors are active or all of them are inactive, the expected activity  
 60 level of the entire receptor cluster is  $\langle a \rangle = (1 + e^{-n\Delta f})^{-1}$  (Phillips et al. 2012).

61 Therefore, a general formulation for the average activity level of a cell sensing chemoattractant L  
 62 is

$$63 \quad \langle a \rangle = \frac{1}{1 + e^{[nf_m(m) + nf_L([L])]}}, \quad f_L([L]) = \log \left[ \frac{1 + C_I}{1 + C_A} \right], \quad (\text{A-8})$$

64 where  $m$  is the methylation level and  $C_I (C_A)$  is the ratio of the probabilities of a receptor being bound  
 65 versus ligand-free for an inactive (respectively, active) receptor.

66 We first rederive the  $C$  term for MeAsp to demonstrate how the MWC model can be extended to de-  
 67 scribe maltose chemotaxis. By definition, the dissociation constant is  $K_{\text{MeAsp}} = [\text{R}]_{\text{free}}[\text{MeAsp}]/[\text{R:MeAsp}]$ ,  
 68 where  $[\text{R}]_{\text{free}}$  and  $[\text{MeAsp}]$  are the effective concentrations of free receptor and ligand in the periplasm  
 69 and  $[\text{R:MeAsp}]$  is the concentration of bound receptor. Defining  $[\text{R}] = [\text{R}]_{\text{free}} + [\text{R:MeAsp}]$ ,  $[\text{R:MeAsp}] =$   
 70  $[\text{R}][\text{MeAsp}] / (K_{\text{MeAsp}} + [\text{MeAsp}])$ . Thus, the probability a receptor is bound is

$$71 \quad P = \frac{[\text{R:MeAsp}]}{[\text{R}]} = \frac{[\text{MeAsp}]}{K_{\text{MeAsp}} + [\text{MeAsp}]}, \quad (\text{A-9})$$

72 so

$$73 \quad C = \frac{P}{1 - P} = \frac{[\text{MeAsp}]}{K_{\text{MeAsp}}}. \quad (\text{A-10})$$

74 Therefore, distinguishing an active from an inactive receptor,

$$75 \quad f_{\text{MeAsp}}([\text{MeAsp}]) = \log \left[ \frac{1 + [\text{MeAsp}]/K_{\text{I,MeAsp}}}{1 + [\text{MeAsp}]/K_{\text{A,MeAsp}}} \right]. \quad (\text{A-11})$$

76 Note that because MeAsp is not metabolized by the cell, the steady-state concentration of MeAsp in  
 77 the periplasm is equal to the extracellular concentration of MeAsp.

78 Adding sensing to the ABC transport model complicates an already complicated system. To sense  
 79 maltose, the receptors must compete with the ABC transporters to bind with the ligand-binding protein  
 80 complex. Optimally, however, sensing would minimally hinder transport to thus minimally decrease  
 81 the cell's growth rate. We thus make the simplifying assumption that sensing does not affect transport  
 82 but simply "reads" the state of the system. This is a reasonable approximation given that the abundance  
 83 of maltose-binding protein greatly exceeds the abundance of the cognate ABC transporter.

84 Therefore, we assume that the ABC transporters and receptors do not compete for the ligand-  
 85 binding protein complex and likewise assume that the receptors do not affect binding and dissociation  
 86 of the binding protein with maltose. Therefore, we modify the transport model to incorporate sensing  
 87 only via a simple modification to Equation A-1:

$$88 \quad [\text{L:BP}]_0 \equiv [\text{R:L:BP}] + [\text{L:BP}] \approx [\text{BP}]_{\text{total}} \frac{[\text{L}]_p}{K_{\text{BP}} + [\text{L}]_p}, \quad (\text{A-12})$$

89 where R:L:BP is the receptor bound to the ligand-binding protein complex.

90 We assume that the receptor can only bind to the complex and not to the binding protein on its own  
91 so that we can describe sensing by the following mass-action kinetics:

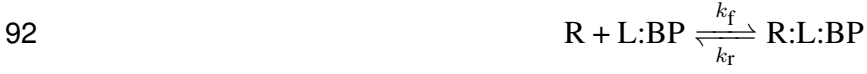

93 At steady-state, the concentration of the bound receptor does not change, so that

$$94 \quad [\text{R:L:BP}] = \frac{[\text{R}][\text{L:BP}]}{K}, \quad K = \frac{k_r}{k_f}. \quad (\text{A-13})$$

95 Combining Equations A-12 and A-13, we obtain that the total concentration of maltose-MBP com-  
96 plex bound to an inactive (I) or active (A) receptor is

$$97 \quad [\text{R:L:BP}]_{\text{I,A}} = \frac{([\text{R}]_{\text{total}} - [\text{R:L:BP}]_{\text{I,A}})([\text{L:BP}]_0 - [\text{R:L:BP}]_{\text{I,A}})}{K_{\text{I,A}}}, \quad (\text{A-14})$$

98 where  $K_{\text{I,A}} = K_{\text{I}}$  when all of the receptors in the cluster are inactive and  $K_{\text{I,A}} = K_{\text{A}}$  when all of the  
99 receptors are active. Therefore, the terms  $[\text{R:L:BP}]_{\text{I,A}}$  are the solutions to quadratic equations, and the  
100 free energy term for maltose is:

$$101 \quad f_{\text{Mal}}([\text{L}]_{\text{ext}}) = \log \left[ \frac{1 + C_{\text{I}}}{1 + C_{\text{A}}} \right], \quad C_{\text{I,A}} = \frac{[\text{R:L:BP}]_{\text{I,A}}}{[\text{R}]_{\text{total}} - [\text{R:L:BP}]_{\text{I,A}}}. \quad (\text{A-15})$$

102 We can use the Heterogeneous MWC (HMWC) model (Keymer et al. 2006; Mello and Tu 2005) to  
103 describe the average activity level in mixed gradients of MeAsp and maltose because MeAsp and the  
104 maltose-binding protein complex bind independently to distinct sites of Tar (Mowbray and Koshland  
105 1987):

$$106 \quad \langle a \rangle = \frac{1}{1 + e^{n_{\text{Tar}}[f_{\text{m}}(m) + f_{\text{MeAsp}}([\text{MeAsp})] + f_{\text{Mal}}([\text{L}]_{\text{ext}})]}. \quad (\text{A-16})$$

## 107 **References**

- 108 Boos, Winfried, and Howard Shuman. 1998. "Maltose/maltodextrin system of Escherichia coli: trans-  
109 port, metabolism, and regulation". *Microbiology and Molecular Biology Reviews* 62 (1): 204–229.  
110 <http://mibr.asm.org/content/62/1/204.short>.
- 111 Bosdriesz, Evert, et al. 2018. "Low affinity uniporter carrier proteins can increase net substrate up-  
112 take rate by reducing efflux". *Scientific Reports* 8 (1): 5576. ISSN: 2045-2322. doi:10.1038/  
113 s41598-018-23528-7. [https://www.nature.com/articles/s41598-018-](https://www.nature.com/articles/s41598-018-23528-7)  
114 [23528-7](https://www.nature.com/articles/s41598-018-23528-7).
- 115 Jiang, Lili, et al. 2010. "Quantitative Modeling of Escherichia coli Chemotactic Motion in Environ-  
116 ments Varying in Space and Time". *PLoS Comput Biol* 6 (4).
- 117 Keymer, Juan E, et al. 2006. "Chemosensing in Escherichia coli: Two regimes of two-state receptors".  
118 *Proceedings of the National Academy of Sciences* 103 (6): 1786–1791.
- 119 Mello, Bernardo A, and Yuhai Tu. 2005. "An allosteric model for heterogeneous receptor complexes:  
120 understanding bacterial chemotaxis responses to multiple stimuli". *Proceedings of the National*  
121 *Academy of Sciences* 102 (48): 17354–17359.
- 122 Mowbray, Sherry L., and Daniel E. Koshland. 1987. "Additive and independent responses in a single  
123 receptor: Aspartate and maltose stimuli on the tar protein". *Cell* 50 (2): 171–180. ISSN: 0092-8674.  
124 doi:10.1016/0092-8674(87)90213-3. [http://www.sciencedirect.com/  
125 science/article/pii/0092867487902133](http://www.sciencedirect.com/science/article/pii/0092867487902133).
- 126 Norris, Noele, et al. 2021. "Mechanistic model of nutrient uptake explains dichotomy between marine  
127 oligotrophic and copiotrophic bacteria". *PLOS Computational Biology* 17, no. 5 (): 1–21. doi:10.  
128 1371/journal.pcbi.1009023. [https://doi.org/10.1371/journal.pcbi.](https://doi.org/10.1371/journal.pcbi.1009023)  
129 [1009023](https://doi.org/10.1371/journal.pcbi.1009023).
- 130 Phillips, Rob, et al. 2012. "Bacterial Chemotaxis". In *Physical Biology of the Cell*, 872–883. Garland  
131 Science. ISBN: 978-1-134-11158-9.

157 **Supplemental Figures**

158

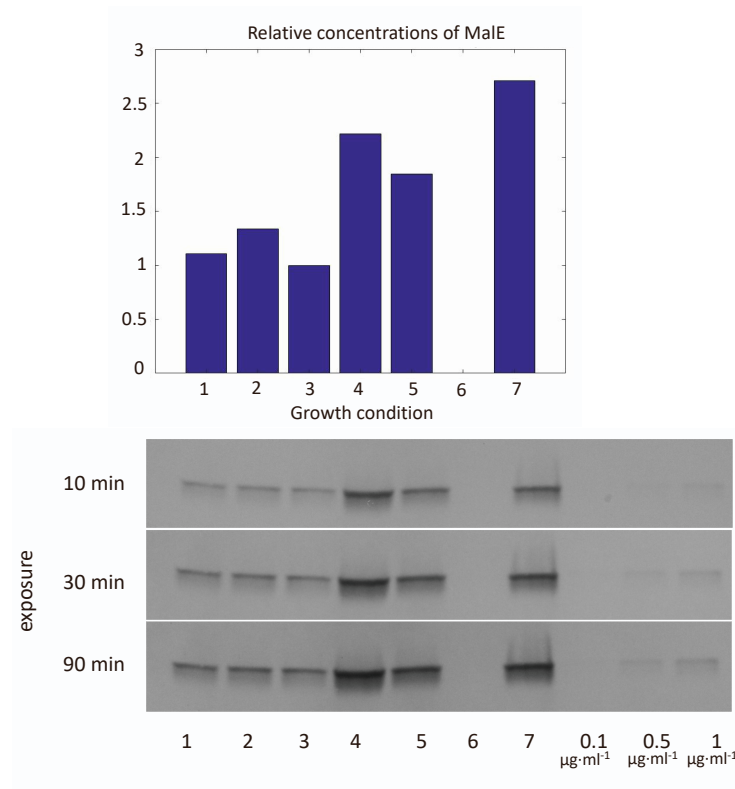

159

160 **Figure S1: Western blot for MalE.** The bar plot shows the relative concentration of MalE normalized by  
161 total protein concentrations over the following growth and experimental conditions: (1) wild-type cell  
162 grown in tryptone broth, put in solution without any maltose, (2) wild-type cell grown in tryptone broth,  
163 put in 1  $\mu\text{M}$  maltose, (3) wild-type cell grown in tryptone broth, put in 10  $\mu\text{M}$  maltose, (4) wild-type cell  
164 grown in tryptone broth and harvested at  $\text{OD}_{600} = 0.9$ , put in 1  $\mu\text{M}$  maltose, (5) wild-type cell grown in  
165 tryptone broth with 500  $\mu\text{M}$  maltose, put in 1  $\mu\text{M}$  maltose, (6) del-malE strain grown in tryptone broth  
166 with 500  $\mu\text{M}$  maltose, put in 1  $\mu\text{M}$  maltose, (7) del-tar strain grown in tryptone broth with 500  $\mu\text{M}$   
167 maltose, put in 1  $\mu\text{M}$  maltose. (8-10) three MalE concentrations. The loading volume was 10  $\mu\text{L}$  for all  
168 samples. We conclude that MalE abundances were invariant over the experimental conditions shown in  
169 Figure 3 because abundances did not vary greatly over lanes 1-3. We estimated that supplementing the  
170 tryptone broth with maltose during growth doubled MalE abundance by comparing lanes 1 and 5.

171



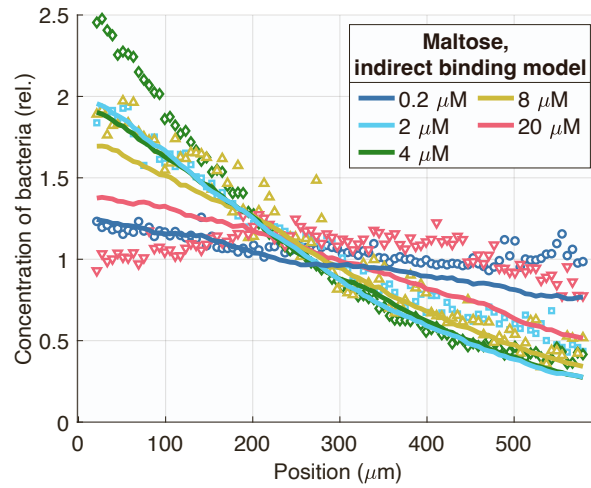

172

173 **Figure S2: Predicted steady-state distributions of cells using best fit of SPECS with**  
 174 **indirect-binding model.** Experimental cell distributions in maltose with predictions from  
 175 SPECS simulator incorporated with indirect-binding model and using best-fit parameters from  
 176 parameter sweep (Methods):  $n_{\text{Tar}} = 6$ ,  $K_{\text{BP}} = 2.6 \mu\text{M}$ ,  $K_{\text{I,Mal}}/[\text{BP}] = 0.8$ ,  $K_{\text{A,Mal}}/[\text{BP}] = 1.92$ , and  $p_0$   
 177  $= 0$ .

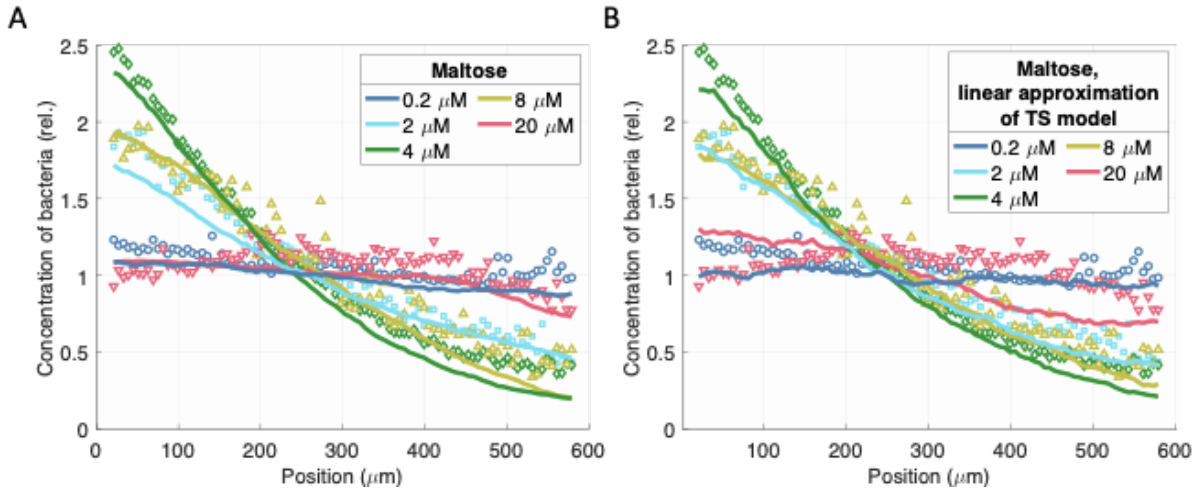

178

179 **Figure S3: The linear approximation of the transport-and-sensing model.** (A) Experimental  
 180 data and best fit using transport-and-sensing chemotaxis model. (B) Experimental data and best  
 181 fit using linear approximation of transport-and-sensing chemotaxis model, in which we assume  
 182  $[L:BP] \approx \alpha[L]_{\text{ext}}$ . The best-fit parameter values obtained from the parameter sweep are:  $K_I/\alpha =$   
 183  $0.72 \mu\text{M}$ ,  $K_A/\alpha = 1.18 \mu\text{M}$ , and  $[R]/\alpha = 1.18 \mu\text{M}$ . The linear approximation does not capture  
 184 the saturation of the response at  $20 \mu\text{M}$  maltose because our transport model suggests that  $[L:BP]$   
 185 is, in fact, a sigmoidal function of  $[L]_{\text{ext}}$  (Figure 4).

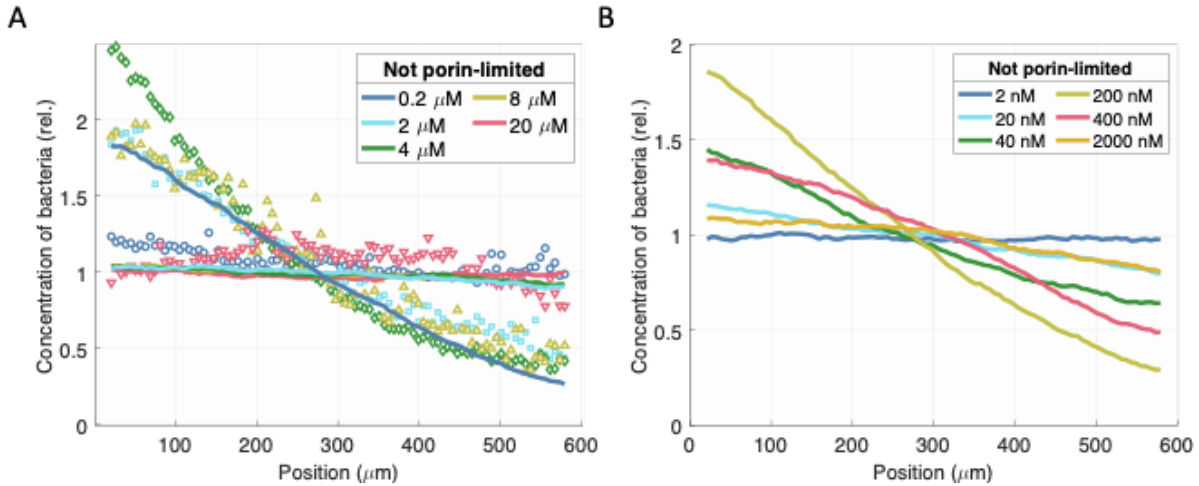

186

187 **Figure S4: Chemotactic response if transport were not porin-limited.** We obtained the above  
 188 plots using the fitted parameters of the transport-and-sensing chemotaxis model but incorrectly  
 189 assuming that  $[L]_p \approx [L]_{ext}$  so that  $[L:BP] \approx [BP]_{total}[L]_{ext}/(K_{BP} + [L]_{ext})$ . (A) We plot the  
 190 experimental data for reference. When we assume that transport is no longer porin-limited, our  
 191 model predicts that the cell can no longer sense gradients in the micromolar regime. (B) Instead,  
 192 its chemotactic sensitivity has shifted down to the nanomolar regime.

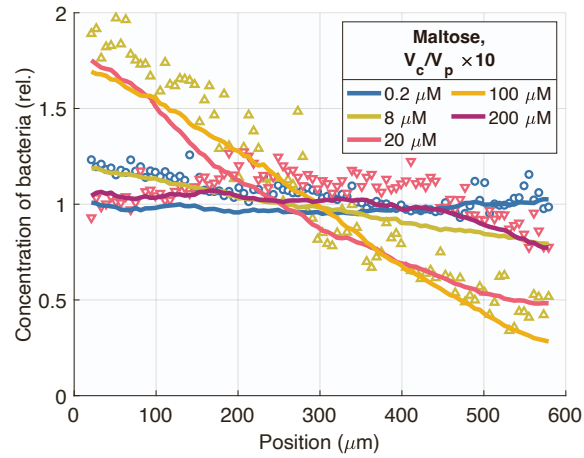

193

194 **Figure S5: Increasing the dynamic sensing range by decreasing outer-membrane**  
 195 **permeability.** If the cell further decreased maltoporin abundance to make transport even more  
 196 porin-limited, it could increase its dynamic sensing range. However, this would decrease uptake  
 197 affinity. We hypothesize that this trade-off between sensing range and uptake affinity may  
 198 explain *E. coli*'s narrow sensing range for maltose.

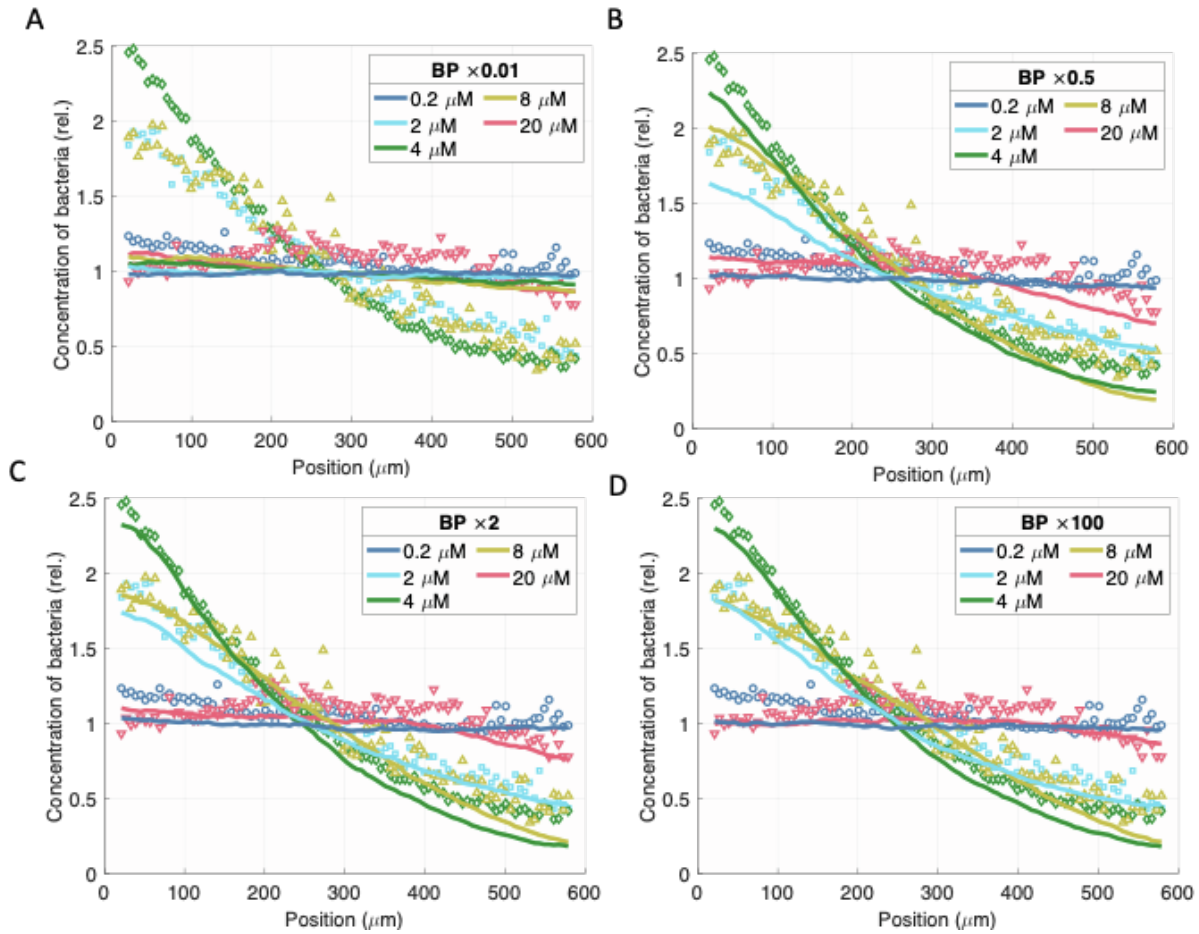

199

200 **Figure S6: Insensitivity of chemotactic response to binding protein abundance.** Although  
 201 the chemotactic response disappears when the binding protein abundance, [BP], is drastically  
 202 reduced by a factor of 100 (A), the chemotactic response is insensitive to both smaller variations  
 203 in abundance (B) and increases in binding protein abundance (C&D). This insensitivity to  
 204 binding protein abundance can be easily seen from the linear approximation of the chemotactic  
 205 signal,  $[L:BP]$ , as a function of  $[L]_{\text{ext}}$ : it is independent of [BP].

206

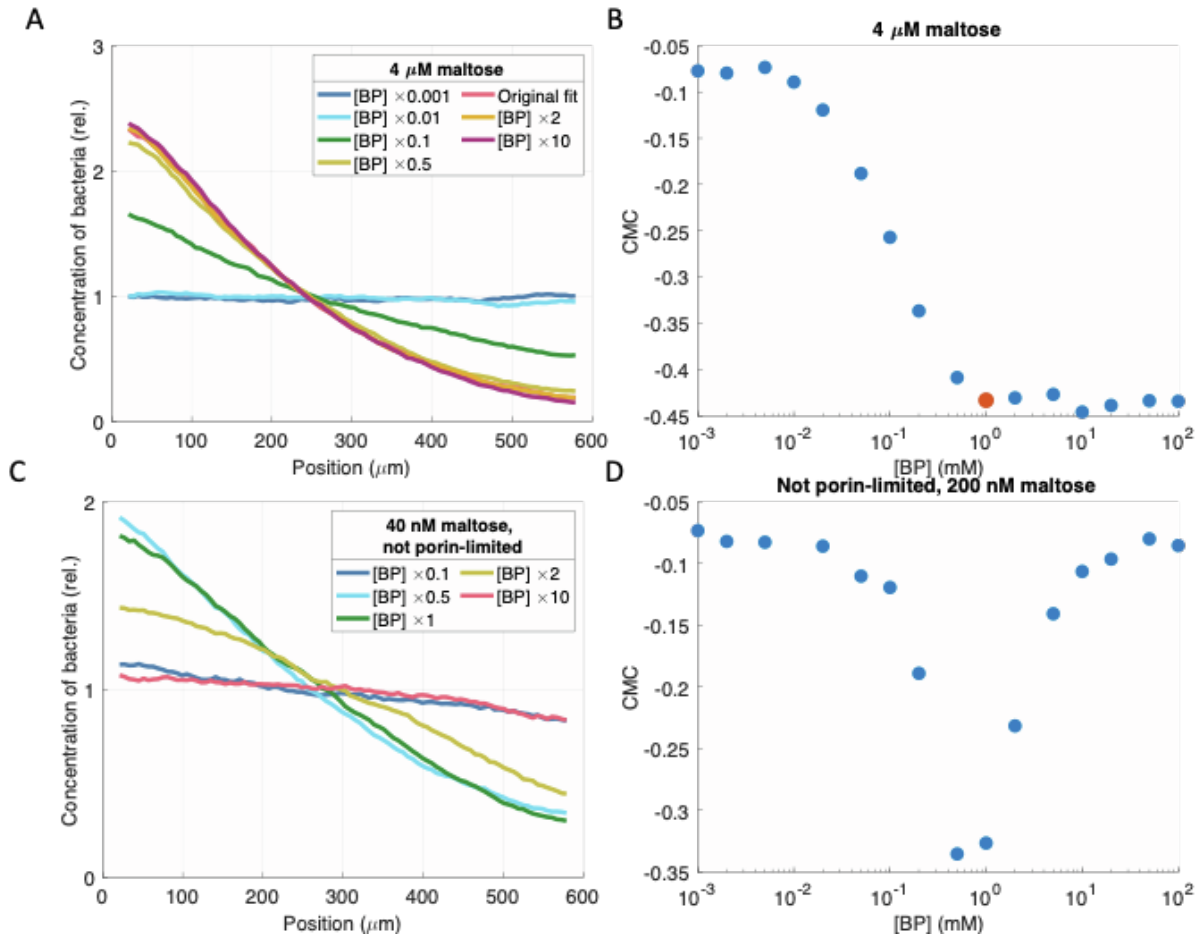

217

218 **Figure S7: Sensitivity of response to binding protein abundance.** Here we use our fitted  
 219 SPECS model to predict the peak chemotactic response as a function of binding protein  
 220 abundance. To quantify the response, we use the chemotaxis migration coefficient (CMC), which  
 221 is defined as  $CMC = \frac{\langle x \rangle - 300}{300}$ , where  $\langle x \rangle$  is the average position in microns of the cells across the  
 222 600 μm channel. (A&B) Our model suggests that the CMC does not vary for sufficiently high  
 223 binding protein abundances. The red dot indicates our estimate of the cells' average binding  
 224 protein abundance and corresponding response at 4 μM maltose. (C&D) On the other hand, if  
 225 instead transport were not porin-limited, the response would be highly sensitive to binding  
 226 protein abundance.

217

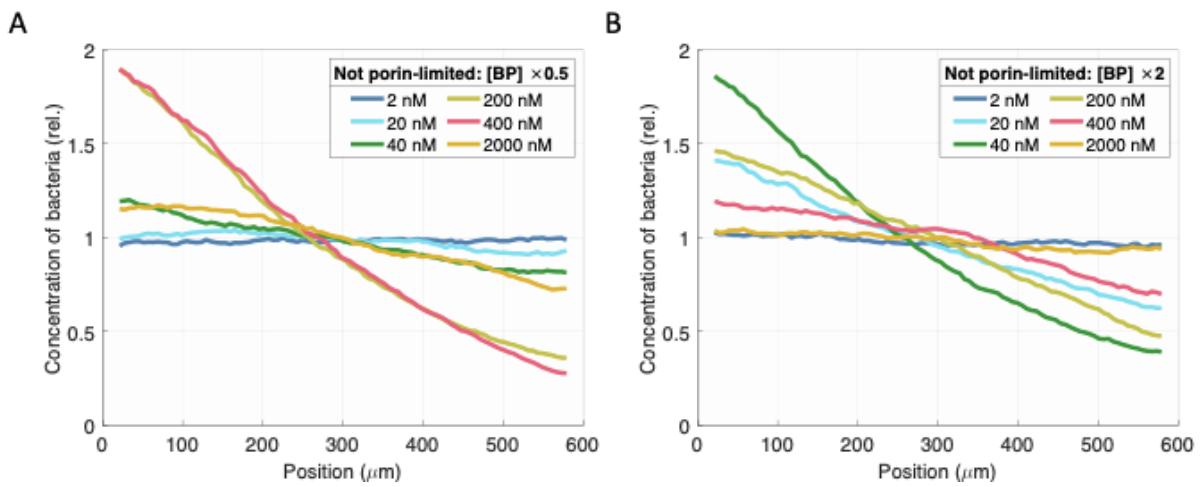

218

219 **Figure S8: Sensitivity of the chemotactic response to binding protein abundance when**  
220 **transport is not porin-limited.** If instead transport were not porin-limited so that  $[L]_p \approx [L]_{\text{ext}}$ ,  
221 then the chemotactic response would be proportional to binding protein abundance and thus the  
222 response would be highly sensitive to variations in binding protein abundance.

223 A

B

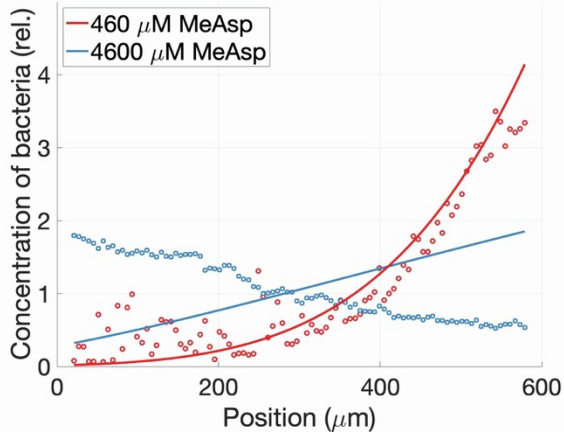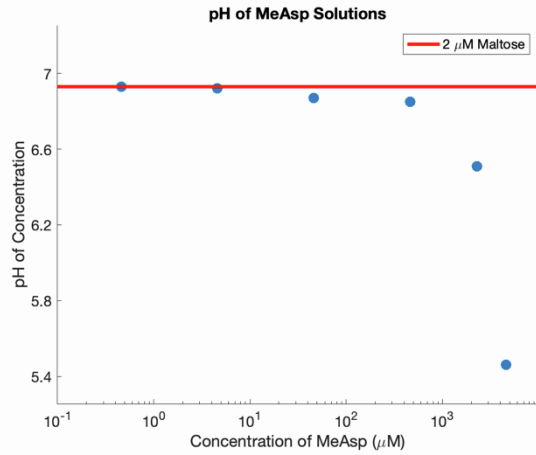

224

225

226 **Figure S9: Cells are repelled from high concentrations of MeAsp. (A) Steady-state**

227 distributions from experimental chemotaxis assays in gradients of MeAsp along with predicted

228 best-fit using analytical approximation with direct-binding model. (B) pH of MeAsp solutions

229 used in experiments. Because we suspect pH taxis causes repulsion (Hu & Tu, 2014), we

230 restricted our model fitting to concentrations of MeAsp less than 500 μM.



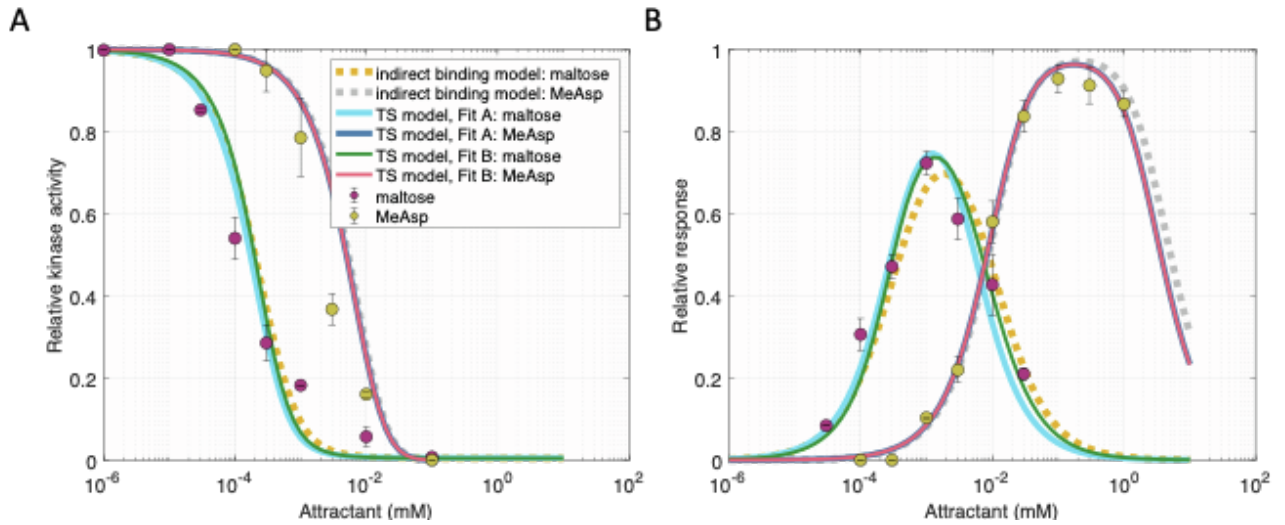

231

232 **Figure S10: Fitting the transport-and-sensing model to FRET activity assays.** Here we  
 233 compare the best fits obtained by Neumann *et al.* using their indirect binding model and best fits  
 234 we obtained using our transport-and-sensing (TS) model (Methods). The FRET assay data in (A)  
 235 shows the dose response of *E. coli* LJ110  $\Delta(\text{cheY cheZ})$  to step additions of maltose or methyl-  
 236 aspartate (MeAsp), and (B) shows the dynamic range to three-fold step additions, during which  
 237 the cells were adapted prior to each new addition (Neumann *et al.*, 2010). The indirect-binding  
 238 model assumes that the periplasmic concentration of free maltose equals the extracellular  
 239 concentration, and its fit is with receptor cooperativity  $n_{\text{Tar}} = 6$ , binding protein dissociation  
 240 constant  $K_{\text{BP}} = 2 \mu\text{M}$ , dissociation constant to binding protein ratios  $K_{\text{I,Mal}}/[\text{BP}] = 0.4$  and  
 241  $K_{\text{A,Mal}}/[\text{BP}] = 6$ , and methyl-aspartate dissociation constants  $K_{\text{I,MeAsp}} = 30 \mu\text{M}$  and  
 242  $K_{\text{A,MeAsp}} = 500 \mu\text{M}$ . Fit A of our transport-and-sensing (TS) model uses parameters:  $n_{\text{Tar}} = 6$ ,  $K_{\text{I,MeAsp}}$   
 243  $\text{MeAsp} = 27.5 \mu\text{M}$ ,  $K_{\text{A,MeAsp}} = 365 \mu\text{M}$ ,  $K_{\text{I,Mal}} = 14.4 \mu\text{M}$ ,  $K_{\text{A,Mal}} = 49.7 \mu\text{M}$ ,  $[\text{R}]_{\text{total}} = 12.6 \mu\text{M}$ ,  
 244  $[\text{BP}]_{\text{total}} = 101 \mu\text{M}$ , and  $V_{\text{c}}/V_{\text{p}} = 1.09 \times 10^{-5}$ . Fit B uses parameters:  $n_{\text{Tar}} = 6$ ,  $K_{\text{I,MeAsp}} = 27.5 \mu\text{M}$ ,  
 245  $K_{\text{A,MeAsp}} = 363 \mu\text{M}$ ,  $K_{\text{I,Mal}} = 394 \mu\text{M}$ ,  $K_{\text{A,Mal}} = 2,040 \mu\text{M}$ ,  $[\text{R}]_{\text{total}} = 21.0 \mu\text{M}$ ,  $[\text{BP}]_{\text{total}} = 1290 \mu\text{M}$ ,

246 and  $V_c/V_p = 1.00 \times 10^{-5}$ . Fit A correctly predicts maltose-Tar dissociation constants in the  
247 micromolar range but predicts low binding protein abundances. On the other hand, Fit B predicts  
248 reasonable protein abundances but much too high dissociation constants.

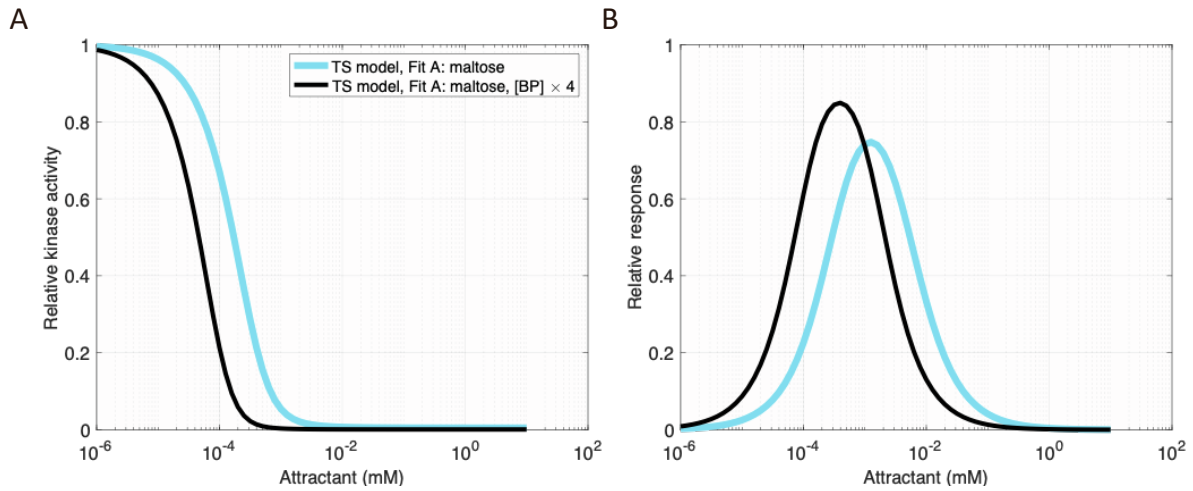

249

250 **Figure S11: Modifying binding-protein abundance for Fit A of transport-and-sensing model**  
 251 **to FRET data.** Fit A of the transport-and-sensing model (Figure S10) predicts a binding-protein  
 252 abundance that is a factor of ten lower than previous literature estimates. However, the finding  
 253 from the FRET assays that increased binding-protein expression increases chemotactic  
 254 sensitivity supports our hypothesis that binding-protein abundance was low for the strain and  
 255 culture conditions of the FRET assays: our model predicts that, in this regime of low binding-  
 256 protein abundance, chemotactic sensitivity increases with binding protein abundance.

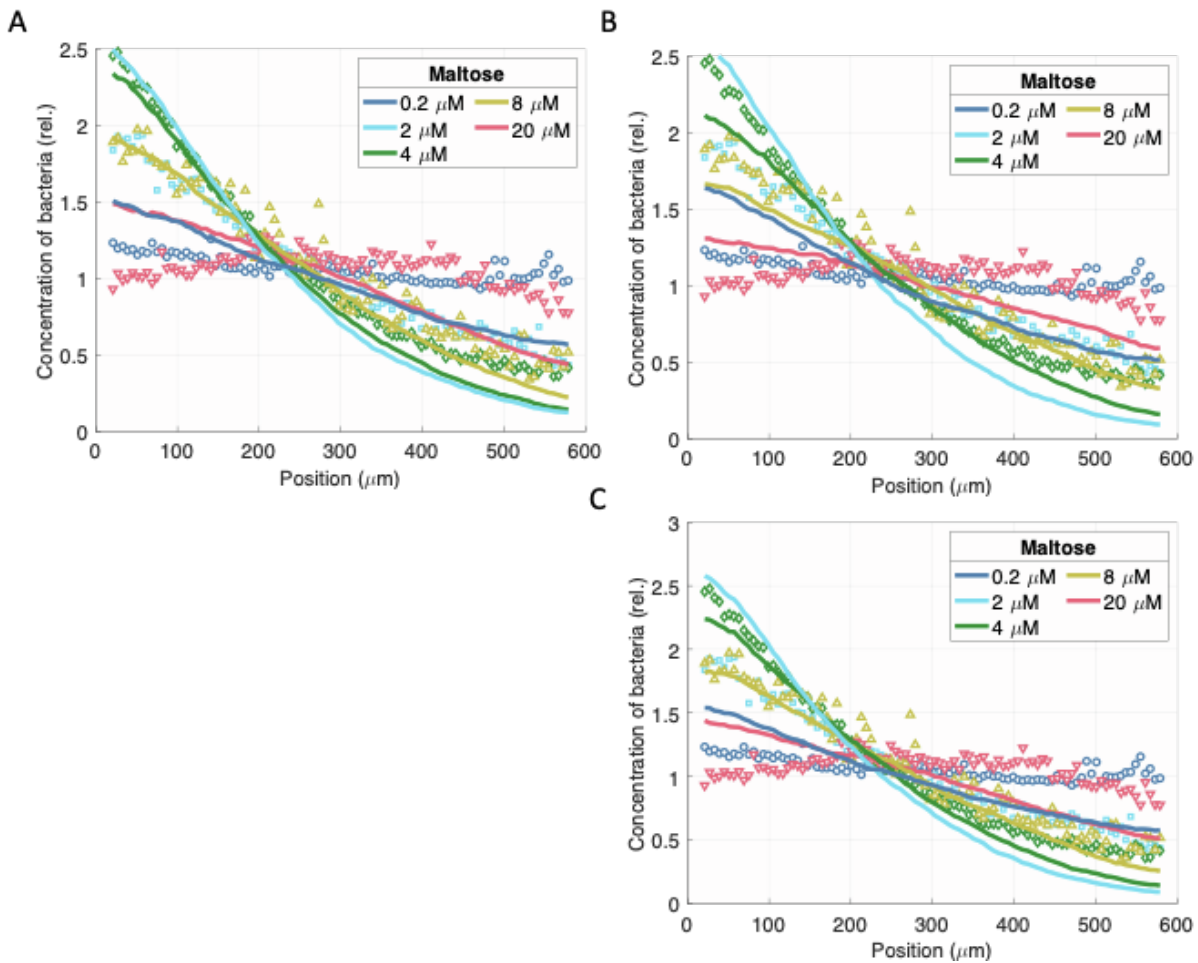

258

259 **Figure S12: Predicted steady-state distributions of cells in maltose gradients using SPECS**260 **simulator with fits using FRET activity level assays.** (A) Experimental cell distributions shown with

261 predictions from SPECS simulator incorporated with indirect-binding model and using parameters from

262 fitted FRET data:  $n_{\text{Tar}} = 4$ ,  $K_{\text{BP}} = 2 \mu\text{M}$ ,  $K_{\text{I,Mal}}/[\text{BP}] = 0.4$ ,  $K_{\text{A,Mal}}/[\text{BP}] = 6$ , and  $p_0 = 0.1$  (Neumann, et

263 al. 2010). Same experimental cell distributions shown with predictions from SPECS simulator

264 incorporated with transport-and-sensing model and using Fit A (B) or Fit B (C) obtained from fitting

265 FRET data (Figure S10) with  $n_{\text{Tar}} = 4$ .
