# Supplementary material
Source: PubMed Central journal article supplement (PMC9247477)
Supplement: mmc2.pdf [file mmc2.pdf]

# Bacterial chemotaxis to saccharides is governed by a trade-off between sensing and uptake

Noele Norris,<sup>1,2,3,\*</sup> Uria Alcolombri,<sup>2</sup> Johannes M. Keegstra,<sup>2</sup> Yutaka Yawata,<sup>4</sup> Filippo Menolascina,<sup>5</sup> Emilio Frazzoli,<sup>6</sup> Naomi M. Levine,<sup>3</sup> Vicente I. Fernandez,<sup>2</sup> and Roman Stocker<sup>2,4</sup>

<sup>1</sup>Department of Electrical Engineering and Computer Science, Massachusetts Institute of Technology, Cambridge, Massachusetts; <sup>2</sup>Institute of Environmental Engineering, Department of Civil, Environmental and Geomatic Engineering, ETH Zürich, Zürich, Switzerland; <sup>3</sup>Department of Biological Sciences, University of Southern California, Los Angeles, California; <sup>4</sup>Faculty of Life and Environmental Sciences, University of Tsukuba, Tsukuba, Japan; <sup>5</sup>School of Engineering, Institute for Bioengineering, The University of Edinburgh, Edinburgh, UK; and <sup>6</sup>Department of Mechanical and Process Engineering, Institute for Dynamic Systems and Control, ETH Zürich, Zürich, Switzerland

**ABSTRACT** To swim up gradients of nutrients, *E. coli* senses nutrient concentrations within its periplasm. For small nutrient molecules, periplasmic concentrations typically match extracellular concentrations. However, this is not necessarily the case for saccharides, such as maltose, which are transported into the periplasm via a specific porin. Previous observations have shown that, under various conditions, *E. coli* limits maltoporin abundance so that, for extracellular micromolar concentrations of maltose, there are predicted to be only nanomolar concentrations of free maltose in the periplasm. Thus, in the micromolar regime, the total uptake of maltose from the external environment into the cytoplasm is limited not by the abundance of cytoplasmic transport proteins but by the abundance of maltoporins. Here, we present results from experiments and modeling suggesting that this porin-limited transport enables *E. coli* to sense micromolar gradients of maltose despite having a high-affinity ABC transport system that is saturated at these micromolar levels. We used microfluidic assays to study chemotaxis of *E. coli* in various gradients of maltose and methyl-aspartate and leveraged our experimental observations to develop a mechanistic transport-and-sensing chemotaxis model. Incorporating this model into agent-based simulations, we discover a trade-off between uptake and sensing: although high-affinity transport enables higher uptake rates at low nutrient concentrations, it severely limits the range of dynamic sensing. We thus propose that *E. coli* may limit periplasmic uptake to increase its chemotactic sensitivity, enabling it to use maltose as an environmental cue.

**SIGNIFICANCE** Bacterial chemotaxis is among the best-studied systems in biology and is paradigmatic of the mechanisms used by cells to link sensory inputs with regulated responses, thus providing insight into the ecological basis of cellular physiology. Here, we present a mechanistic chemotaxis model that describes how the regulation of the transport of a sugar into and out of the cell's periplasm affects the cell's motile response to that sugar. Based on observations from population-level chemotaxis assays, we uncover an ecologically relevant trade-off between sensing and uptake. The general finding of this work is that while high-affinity transport allows for higher uptake rates, it can severely limit the cell's dynamic sensing range.

## INTRODUCTION

Many bacterial species can actively swim to seek environments favorable for growth. These species employ chemotaxis, in which they follow chemical gradients by biasing

their swimming direction in response to temporal measurements of their environment (1). Chemotaxis allows cells to find and exploit chemicals in complex landscapes, such as the ocean or the human gut (2,3). This makes them excellent microscale source-seekers—a trait that could allow bacteria to be re-engineered and deployed as “microbots” for a variety of tasks, such as bioremediation (4,5,6) and targeted medical treatment (7,8). The chemicals that act as attractants for chemotaxis are often metabolic resources for bacteria. However, the precise relationship between chemotaxis and the benefit it confers, either directly through increased uptake of nutrients or indirectly as sensory cues that direct

Submitted November 5, 2021, and accepted for publication May 3, 2022.

\*Correspondence: [noelen@alum.mit.edu](mailto:noelen@alum.mit.edu) or [romanstocker@ethz.ch](mailto:romanstocker@ethz.ch)

Noele Norris's present address is Ecology Department, Earth and Environmental Sciences, Lawrence Berkeley National Laboratory, Berkeley, California.

Editor: Ido Golding.

<https://doi.org/10.1016/j.bpj.2022.05.003>

bacteria into more favorable environments, is less clear and has become a focus of recent chemotaxis research (9,10,11). Here we demonstrate how the cell's ability to sense a nutrient depends on the expression levels of the proteins involved in the uptake of that nutrient. Therefore, a molecular-level understanding of the interplay between sensing and uptake is needed to predict chemotactic responses.

A mechanistic understanding of bacterial chemotaxis has developed over decades of research on model organisms, particularly *Escherichia coli*. An *E. coli* cell swims with a “run-and-tumble” pattern, swimming straight before randomly re-orienting by transiently switching the direction of rotation of the flagellar motors (2). The durations of the runs are controlled by a signal-transduction pathway so that attractant binding events at the membrane-bound receptors inhibit motor switches. An additional pathway links rates of methylation and demethylation of the chemoreceptors to the rate of attractant binding events, allowing the cell to store a short-term memory of past measurements and to adapt to background levels of attractant (12–17). The cell thus senses a gradient by measuring the attractant concentration over time and performs chemotaxis by modifying the probability of the next tumbling event in response to the gradient. This behavior has been accounted for in numerous models of chemotaxis. For example, the agent-based signaling pathway-based *E. coli* chemotaxis simulator (SPECS) incorporates a molecular-level model of chemotaxis to predict the population-level response of cells in environments with gradients of aspartate (18).

Yet, existing models do not capture some fundamental aspects of chemotaxis, for example, when the cell's uptake of the attractant limits that attractant's periplasmic concentration, as is the case for *E. coli*'s uptake of the sugar maltose. *E. coli*'s chemotactic response to maltose presents a puzzle because while all other known *E. coli* sugar chemoattractants are sensed by the minor receptor Trg (19), maltose is sensed by the more abundant aspartate receptor Tar. Maltose and aspartate are sensed independently by Tar because they can bind simultaneously to distinct sites on the receptor (20), so Tar effectively acts as two distinct receptors sharing the same methylation state. Yet, while *E. coli* can respond to concentrations of aspartate over a few orders of magnitude (21), the dynamic range of *E. coli*'s response to maltose spans just one order of magnitude (19,22).

Previous work argued that the narrow dynamic range of maltose sensing in *E. coli* mirrors its narrow dynamic range of sensing other sugars because the sugars bind indirectly to their cognate receptor (19). While aspartate binds directly to Tar, maltose binds to Tar only when in complex with the maltose-binding protein MalE (22,23). Neumann and coworkers proposed an indirect-binding chemotaxis model to account for the effects of the binding protein (19). However, their model assumes that the concentration of free sugars in the cell periplasm is equal to that in the external environment, which is not the case for maltose chemotaxis (24).

The discrepancy between periplasmic and extracellular concentrations of maltose is due to the relatively large size of the maltose molecule. Under approximately steady-state conditions, the periplasmic concentration of a free substrate is equal to its external concentration when the maximal rate at which the substrate can diffuse into the periplasm (that is, the rate of diffusion when no substrate is present in the periplasm) is greater than the rate of uptake of the substrate into the cytoplasm. This is not necessarily the case for saccharides, which diffuse through general porins at rates that are orders of magnitude lower than those of smaller molecules, such as amino acids (25). Because slow rates of diffusion limit uptake (26), bacteria have evolved specialized porins that facilitate the transport of specific sugars into the periplasm (27). Thus, a cell can regulate the abundance of a particular sugar in its periplasm by regulating the expression of the corresponding porin. This, in turn, allows the cell to regulate its chemotactic sensitivity to a sugar by altering the amount of that sugar available for a receptor to sense (28,29).

Previous experiments showed that at extracellular concentrations of approximately 1  $\mu\text{M}$  of maltose, the total rate of maltose uptake into the cytoplasm decreased proportionally with decreasing abundance of the specific maltose porin LamB (24,30). Thus, in the micromolar regime, transport is porin limited. In addition, because of very high concentrations of the maltose-binding protein MalE, which scavenges for maltose in the periplasm, the great majority of maltose in the periplasm is bound rather than free. Therefore, when maltose is present in micromolar concentrations in the environment, there are estimated to be significantly lower concentrations of free maltose within the periplasm (24,26,30–34). Indeed, Tan and coworkers recently suggested that the periplasmic concentration of free maltose must be lower than the extracellular concentration, based on a discrepancy they found when fitting data of *E. coli* capillary assays to their population-level chemotaxis model, which accounted for indirect binding (35).

To explore the implications of porin-limited transport on chemotaxis, we developed a detailed molecular-level chemotaxis model that fully accounts for transport dynamics. The model explicitly accounts for the transport of maltose into the periplasm via the maltoporin LamB (28,36) and out of the periplasm and into the cytoplasm via the ABC maltose transporter MalFGK<sub>2</sub> (33) (Fig. 1). Our transport-and-sensing chemotaxis model incorporates the impact of variable porin and transporter expression on the chemotactic response. Importantly, due to the limiting concentrations of free maltose in the periplasm, our model removes the common simplifying assumption that the free periplasmic concentration of the sensed substrate is independent of the abundance of chemoreceptors (19,35,37) and instead explicitly considers how the chemotactic signal is a function of chemoreceptor abundance.

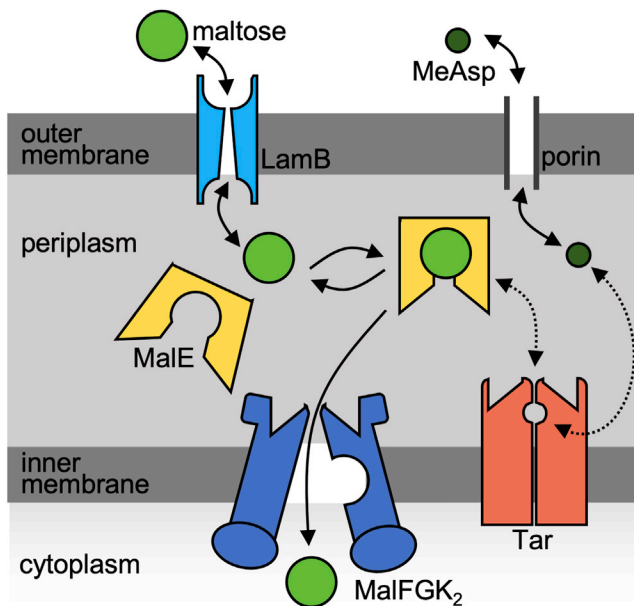

FIGURE 1 Schematic of the transport and sensing of maltose and MeAsp.  $\alpha$ -methyl-DL-aspartate MeAsp (an analog of the amino-acid aspartate) enters and exits the periplasm via general diffusive porins, binds directly to the aspartate receptor, Tar, and is not transported into the cytoplasm. Maltose, in contrast, is larger and enters the periplasm via facilitated diffusion by the maltoporin LamB. The maltose-binding protein (MalE) both 1) binds to the maltose ABC transporter, MalFGK<sub>2</sub>, to allow maltose to be transported into the cytoplasm and 2) allows Tar to sense maltose via a binding site independent of that for MeAsp. To see this figure in color, go online.

To benchmark our model, we fit it separately to both previous chemotaxis fluorescence resonance energy transfer (FRET) assays (19) and population-level microfluidic experiments that we conducted to quantify *E. coli*'s behavior in gradients of the sugar maltose, either by itself or in opposing gradients of  $\alpha$ -methyl-DL-aspartate (MeAsp), a non-metabolizable analog of aspartate. Our model indicates that *E. coli*'s narrow dynamic range of maltose sensing is the result of a trade-off between sensing and uptake. The use of binding proteins allows the cell to achieve high-affinity transport (34,38) but severely limits the concentration of free maltose in the periplasm so that, to sense maltose gradients, the receptor must bind to the maltose-binding protein complex rather than to maltose alone. Hence, the use of binding proteins tightly couples sensing with uptake so that if transport were not porin-limited, the chemotactic sensing range would be dictated by the high affinity of the ABC transport system. Our model suggests that, by instead limiting porin abundance, *E. coli* makes the chemotactic response less sensitive to variations in binding-protein abundance and decouples the regimes at which sensing and cytoplasmic transport saturate. Therefore, although porin-limited transport decreases the total uptake rate at low maltose concentrations, it prevents high-affinity saturation of the chemotactic signal, enabling

the cell to sensitively sense micromolar gradients of maltose.

## MATERIALS AND METHODS

### Cell culture

We used *E. coli* strain RP437, which was obtained from the laboratory of J.S. Parkinson. As controls for the Western-blot analyses, we also used two strains from the Keio library: JW1875-AM (del-tar) and JW3994-AM (del-malE). We grew the cultures overnight in tryptone broth (10 g/L Bacto tryptone, 5 g/L NaCl) in a shaking incubator at 30°C and 300 Rpm, then diluted it 1:100 the following morning into fresh tryptone broth. We harvested the cells, unless otherwise noted, when the culture reached OD<sub>600</sub> = 0.47 in the mid-exponential growth phase. The cells had an exponential growth rate of approximately 0.5 h<sup>-1</sup>. In the one experiment using tryptone broth supplemented with 500  $\mu$ M of maltose as the growth medium, the cells instead had an exponential growth rate of approximately 0.75 h<sup>-1</sup>. Before their use in experiments, we washed cells twice by centrifuging them at 2000  $\times$  g for 5 min and diluted them to OD<sub>600</sub> = 0.05 in motility medium (10 mM potassium phosphate, 0.1 mM EDTA, 1  $\mu$ M methionine, 10 mM lactic acid, pH 7) and then kept the cells in a 4°C refrigerator for 30 min.

### Experimental setup

We performed the chemotaxis assays using a microfluidic device made by sandwiching an agarose gel layer between a glass microscope slide and a polydimethylsiloxane (PDMS) layer patterned with three parallel channels. We created the channels by molding the PDMS onto a silicon wafer with positive-relief features. We fabricated the device with the following specifications (46): the channels were 20-mm long, 100- $\mu$ m deep, and 600- $\mu$ m wide, with 400- $\mu$ m spacing between each channel, and the agarose layer was 0.5-mm thick and consisted of a 3% (w/v) solution of agarose in motility medium.

Each of the three channels contained an inlet and outlet port. The outer two channels functioned as feeder channels within which a steady flow of media, at a rate of 10  $\mu$ L per minute, was maintained using a syringe pump (PHD 2000, Harvard Apparatus, Holliston, MA). We set the syringe pump to "refill" mode to create a negative pressure that, along with loosely fitting clips, helped create a seal between the PDMS and agarose. We flowed motility medium with maltose (D-maltose monohydrate; PHR1497, Sigma-Aldrich, Burlington, MA) at concentrations of 0–20  $\mu$ M in the left channel and motility medium with MeAsp (Sigma-Aldrich M6001) at concentrations of 0–460  $\mu$ M in the right channel. As molecules diffuse freely through agarose, the flow of these solutions in the outer channels created constant gradients within the agarose and hence within the central test channel. The ability of this microfluidic system to maintain linear concentration profiles was verified previously using fluorescein (45). For example, with 2  $\mu$ M of maltose in the left channel and motility medium in the right channel, the cells in the test channel experienced a linear gradient with a slope of approximately  $1.4 \times 10^{-3}$   $\mu$ M/ $\mu$ m and minimum and maximum concentrations of 0.57  $\mu$ M and 1.43  $\mu$ M.

Initially, the central channel was empty of liquid so that, after establishing flow in the outer feeder channels, a steady gradient formed within the lower agarose layer over a timescale of  $L^2/D$ , where  $L$  is the distance between the two feeder channels and  $D$  is the diffusivity of the molecules through agarose. The agarose gel layer has a diffusivity very similar to water so that, for small molecules,  $D \approx 10^3$   $\mu$ m<sup>2</sup>/s. Therefore, with a 1400  $\mu$ m spacing between the edges of the two outer channels, gradients formed across the agarose layer in about 30 min.

Forty-five min after the establishment of flow in the outer channels, we pipetted the refrigerated cells into the test channel and sealed the test channel using glass microscope coverslips. The PDMS and agarose completely

blocked advection so that there was no active flow in the central channel; any flow in the central channel was a result of pressure differences between the two ends of the channel and was negligible compared with the swimming speed of the cells. As the channel is only 100  $\mu\text{m}$  deep, the upward diffusion of the chemoattractants from the agarose layer reached a steady state in approximately 30 s. Thus, the cells quickly experienced a steady gradient in a no-flow environment. The run-and-tumble chemotaxis of *E. coli* yields an effective diffusivity of  $D \approx 300 \mu\text{m}^2/\text{s}$ , so we began data acquisition 20 min after the injection of the cells into the test channel after the bacterial distribution had reached a steady state.

It is important to note that while MeAsp is non-metabolizable, maltose is metabolizable and is consumed during assays. However, the constant flow of nutrients in the outer channel and the low concentration of cells within the test channel ensured that any changes to maltose concentration within the test channel due to consumption were negligible. Specifically, in the concentration regime of our experiments, *E. coli* cells have an estimated maltose uptake rate of 500 pmoles/min/ $10^9$  cells (36). There were about  $4 \times 10^7$  cells/mL in the test channel above an agarose layer 5 times thicker than the channel, which acted as a repository of the nutrient. Therefore, without replacement of maltose, the cells only reduced the concentration within the channel by at most 50 nM after 20 min. However, there was, in fact, replacement, as the wide agarose layer beyond the test channel acted as a source of maltose that was continuously replenished by the flow maintained by the syringe pump.

Under our culture conditions, the cells showed an equal preference for 2  $\mu\text{M}$  of maltose and 6–8  $\mu\text{M}$  of MeAsp in the opposing-gradient experiments (Fig. 3 C and D). For the MeAsp single-gradient experiments, we found the strongest chemotactic response (that is, the steepest steady-state cell distribution in the test channel) when using a MeAsp concentration in the source channel of 46  $\mu\text{M}$  (Fig. 3 B). We were unable to use population-level data to determine the concentration at which Tar's sensing of MeAsp saturates because the cells are, in fact, repelled by very high concentrations of MeAsp (Fig. S9), likely due to pH taxis (61). Therefore, we analyzed the response of cells to MeAsp concentrations up to 500  $\mu\text{M}$ , above which increasing the MeAsp concentration caused a drop in pH (Fig. S9 B).

## Data acquisition and analysis

We acquired images of the chemotaxis assays using a Nikon Eclipse TE2000E inverted microscope fitted with a CCD camera. We imaged the cells using phase contrast with a 20 $\times$  objective (numerical aperture = 0.45). For each experiment, we focused the objective mid-depth and took 1-min videos (at 10 frames per second) of at least 5 different 1-mm segments across the entire length of the test channel (obtaining at least 5 technical replicates per biological replicate).

To determine the positions of the bacteria, we analyzed the videos using in-house MATLAB image analysis code that subtracted any non-motile cells. We determined the positions of the bacteria in all frames and thus obtained bacterial position data for 600 frames per segment along the channel. There were about 100 bacteria per frame. We replicated each chemotaxis assay 1–3 times, each time using a new cell culture (obtaining 1–3 biological replicates for each experimental condition tested). We combined the bacterial-position data from the technical replicates to obtain a single distribution per biological replicate. Finding very good agreement between the resulting distributions across biological replicates, we summed the bacterial position data over the biological replicates (approximately  $N = 1.2$  million bacterial positions) to obtain one distribution corresponding to each experimental condition. This is the distribution we used for all subsequent analysis. Note that because we caught the same bacterium on multiple frames per channel segment, these  $N$  positions are not independent.

For the parameter fitting, we first smoothed the data by fitting a power curve to the obtained empirical distributions: for accumulation toward MeAsp, the power fit is of form  $f(x) = ax^n + b$ , where  $x$  is the position in microns along the test channel; for accumulation toward maltose, the power fit is of form  $f(x) = a(600-x)^n + b$ . We smoothed the data to subtract noise

from poorly swimming and nonmotile cells and chose a power fit because it fitted the distributions well and approximates the analytical expression for the empirical distribution used in our model.

## Agent-based simulations

We ran agent-based simulations of *E. coli* chemotaxis in opposing gradients of maltose and MeAsp. We modified the free-energy difference equations in the original SPECS to incorporate both the heterogeneous Monod-Wyman-Changeux model as well as our transport-and-sensing model. We assumed that all additional parameters have the same values as provided in SPECS (18). These parameters include the time discretization, swimming velocity, tumble time, methylation-dynamics parameters, Hill coefficient of the motor response, and average directional change due to Brownian rotational diffusion. To describe imperfect adaptation, we modified the methylation dynamics so that the methylation level saturates at a maximum level of 4. In our simulations, when a cell hits the boundary, it modifies its orientation so that it faces away from the boundary with a random angle from a uniform distribution. We used a time step of 0.1 s. To obtain steady-state distributions, we simulated 1000 cells for 80 min of simulated time (48,000 iterations) and averaged their locations over the final 40 min of the simulated time (see code on Github at: [https://github.com/noelenorris/maltose\\_chemotaxis.git](https://github.com/noelenorris/maltose_chemotaxis.git)).

## Fitting the model to FRET data

We fit our transport-and-sensing model to previous FRET reporter assays of the dose response and dynamic sensing range of *E. coli* LJ110 to additions of maltose and MeAsp (Figs. 1 A and 2 A in (19)). We used MATLAB's general nonlinear optimizer, *fmincon*, and solved for the parameter values that minimized the sum of squares of the differences between the observed and predicted dynamic range measurements, constraining the cooperativity of Tar to  $n_{\text{Tar}} = 6$  (see our code on Github at: [https://github.com/noelenorris/maltose\\_chemotaxis.git](https://github.com/noelenorris/maltose_chemotaxis.git)).

## Fitting SPECS models to the chemotaxis assays

Due to the computational intractability of running sets of agent-based simulations within an optimization program, we performed parameter sweeps to find good fits for SPECS that used either the original indirect-binding model (19) or our transport-and-sensing model to describe the chemotactic response to maltose.

Because we were unable to find a good fit using the indirect-binding model, we used multiple parameter sweeps—over a large range and with finer discretizations—to ensure that we were not missing a better fit. Over these various sweeps, we spanned  $K_{\text{BP}} = [0.5:0.1:3]$ ,  $p_0 = [0:0.05:0.5]$ ,  $K_i/[BP] = [0.2:0.1:1 \ 2:2:50 \ 50:10:500]$  and  $K_A/K_I = [1.2:0.1:10]$ .

On the other hand, because of the even larger parameter space for our transport-and-sensing model, our approach was to use previous estimates from the literature to constrain the parameter space as much as possible and then show that, even with these constraints, we could find good fits that captured the response of our chemotaxis assays. We constrained the binding protein abundance to  $[BP]_{\text{total}} = 1000 \mu\text{M}$  (60), the receptor abundance to  $[R]_{\text{total}} = 20 \mu\text{M}$  (50), and the ratio of the cytoplasmic to periplasmic maximal uptake rates to  $V_c/V_p \in [10^{-5}, 10^{-3}]$  (34). We used estimates that the aspartate to serine receptor ratio (Tar/Tsr) is 1.5 times higher in an LJ110 strain than in an RP437 strain (19) to constrain the receptor cooperativity to  $n_{\text{Tar}} = 4$ .

To compare fits over our parameter sweeps, we used the following goodness-of-fit measure:

$$J = \sum_k \sum_x |p_k(x) - f_k(x)|^2, \quad (1)$$



where  $f_k(x)$  ( $p_k(x)$ ) is the smoothed empirical distribution from experiment  $k$  (simulation  $k$ ) and  $x$  is 100 binned positions spanning the 600- $\mu\text{m}$  channel. To obtain the fits for SPECS with the transport-and-sensing model, we summed over the following single- and opposing-gradient experiments: five maltose single-gradient experiments (0.2, 2, 4, 8, and 20  $\mu\text{M}$  maltose), four MeAsp single-gradient experiments (1.15, 4.6, 46, and 460  $\mu\text{M}$  MeAsp), and eight maltose and MeAsp opposing-gradient experiments (2  $\mu\text{M}$  maltose and 0.46, 2, 4, 6, 8, 10, 46, and 460  $\mu\text{M}$  MeAsp). In our attempt to fit SPECS with the indirect-binding model, we summed only over the five maltose single-gradient experiments.

## Western-blot assay of MalE expression

To confirm that there was no change in MalE expression levels over the maltose concentrations and time durations of our experiments, we performed a Western-blot analysis of MalE (Fig. S1). We cultured, washed, and harvested the cells according to the protocol described above and then placed the cells in 3 mL of motility medium with various concentrations of maltose. Because the cells experienced the maltose gradients for at most 30 min in our chemotaxis assays, after 30 min, we froze the samples at  $-80^\circ\text{C}$  until we performed immunoblotting. To lyse the cells, we added 200  $\mu\text{L}$  lysis buffer (50 mM Tris, 100 mM NaCl, 0.1% Triton X-100, 250 U/mL benzonase nuclease, and 0.4 mg/mL lysozyme) into each 3-mL frozen sample, vortexed them, and shook the tubes for 30 min at  $37^\circ\text{C}$ . We then added loading Laemmli buffer (1:4) and incubated them at  $95^\circ\text{C}$  for 5 min. We loaded 10  $\mu\text{L}$  of each sample into a pre-prepared 12% sodium dodecyl sulfate gel (Bio-Rad, Hercules, CA) and separated the protein by electrophoresis at 100 V for 1 h in a Bio-Rad Tetra cell apparatus. We blotted the gel against a polyvinylidene difluoride membrane using transfer buffer (25 mM Tris, 190 mM glycine, 20% methanol) at 100 V for 1 h. We then blocked the blot using blocking buffer (3% bovine serum albumin in phosphate-buffered saline with Tween 20 [PBST]) for 1 h at room temperature. For the primary antibody, we used 1  $\mu\text{g}/\text{mL}$  anti-MalE (unconjugated rabbit polyclonal antibody; LS-C355688, LSBio, Seattle, WA) in blocking buffer for 1 h at room temperature and then placed it in a  $4^\circ\text{C}$  refrigerator overnight. The following morning, we washed the blot three times in PBST. For the secondary antibody, we used 1:5000 goat anti-rabbit immunoglobulin G secondary antibody (65–6120, Thermo Fisher Scientific, Waltham, MA) in blocking buffer, maintained it for 2 h at room temperature, and then washed it three times in PBST. We stained the blot with 1-step Ultra TMB blotting solution, leaving the blot covered at room temperature. We acquired images after 10-, 30-, and 90-min exposure. We quantified the bands of the resulting blot using ImageJ software (<https://imagej.nih.gov/ij/>) and normalized the intensity of each band by their respective total protein concentrations, obtained by absorbance measurements at 280 nm (A280) from Thermo-Scientific NanoDrop ultraviolet-visible spectrophotometry.

## Code availability

The code used for the agent-based simulations and data fitting is available at: [https://github.com/noelenorris/maltose\\_chemotaxis.git](https://github.com/noelenorris/maltose_chemotaxis.git).

## RESULTS

### A transport-and-sensing chemotaxis model

Because previous research demonstrated that maltoporin abundance can limit the periplasmic concentration of free maltose, we developed a transport-and-sensing model of chemotaxis that accounts for the transport kinetics of maltose into and out of the cell's periplasm and for the impact of these kinetics on *E. coli*'s sensing of maltose

(Fig. 1). We provide an outline of the model here, leaving a detailed derivation for Appendices S1 and S2.

During chemotaxis, the instantaneous probability that a cell tumbles is a function of the receptor activity level. We follow previous models and assume that the receptors within a cluster are either all active or all inactive and that the average activity of the clusters,  $a$ , is the probability that a receptor cluster is active (37). This probability is a function of the free-energy difference  $f$  between the active and inactive states. Following the heterogeneous Monod-Wyman-Changeux model, which describes the integration of multiple chemotactic signals that share the same methylation dynamics (39–42), we assume that the free-energy differences of the receptor types are additive so that in an environment where the only chemoeffector gradients present are of maltose and MeAsp,

$$\langle a \rangle = \left[ 1 + e^{(f_m(m) + n_{\text{Tar}}f_{\text{Mal}} + n_{\text{Tar}}f_{\text{MeAsp}})} \right]^{-1}, \quad (2)$$

where  $f_m(m)$  is the free-energy difference between an active and inactive receptor cluster in the absence of chemoattractants and depends on the average methylation level of the cluster,  $m$ ;  $n_{\text{Tar}}$  is the effective number of Tar receptors in a cluster; and  $f_{\text{Mal}}$  ( $f_{\text{MeAsp}}$ ) is the free-energy difference between an active and inactive Tar receptor bound to maltose (MeAsp) (37).

The free-energy difference has the following general form (37):

$$f_r = \log \frac{1 + C_I}{1 + C_A}, \quad (3)$$

where  $C_I$  ( $C_A$ ) is the ratio of the probabilities of an inactive (respectively, active) receptor being bound versus unbound. For the case of indirect binding, these ratios are

$$C_{I,A} = \frac{[\text{R:BP:L}]_{I,A}}{[\text{R}]_{\text{total}} - [\text{R:BP:L}]_{I,A}}, \quad (4)$$

where  $[\text{R}]_{\text{total}}$  is the total effective concentration of the tightly clustered receptors in the periplasm and  $[\text{R:BP:L}]_{I,A}$  is the total concentration of ligand-binding protein complex bound to an inactive (or active) receptor.

The quantity  $[\text{R:BP:L}]_{I,A}$  depends on the concentration of maltose-bound MalE that is available for the receptors to bind,  $[\text{L:BP}]$ . We assume that this concentration is purely a function of the concentration of binding proteins in the periplasm,  $[\text{BP}]_{\text{total}}$ , the periplasmic concentration of maltose,  $[\text{L}]_p$ , and the dissociation constant of the two compounds,  $K_{\text{BP}}$ :

$$[\text{L:BP}] \approx \frac{[\text{BP}]_{\text{total}}[\text{L}]_p}{K_{\text{BP}} + [\text{L}]_p}. \quad (5)$$

We solve for  $[L]_p$  as a function of  $[L]_{ext}$  by assuming a quasi-steady-state equilibrium in which the rate of maltose transport into the periplasm,  $v_p$ , is equal to the rate of its transport out of the periplasm and into the cytoplasm,  $v_c$ , where

$$v_c = V_c \left( \frac{[BP]_{total}}{K_c + [BP]_{total}} \right) \left( \frac{[L]_p}{\frac{K_c K_{BP}}{K_c + [BP]_{total}} + [L]_p} \right); \quad (6)$$

$$v_p = V_p \frac{[L]_{ext} - [L]_p}{K_p + [L]_{ext} + [L]_p}; \quad (7)$$

$V_c(V_p)$  is the maximal cytoplasmic (periplasmic) uptake rate, which is a function of the number of expressed ABC transporters (porins),  $K_p$  is the half-saturation constant of the porin, and  $K_c$  is the dissociation constant between the maltose-MalE complex and the ABC transporter (34).

As a result of our assumption of low periplasmic concentrations of maltose, we cannot make the common simplifying assumption that the free periplasmic chemoattractant concentration is independent of the abundance of chemoreceptors (19,35,37). We instead assume that the concentration of bound receptors is

$$[R:BP:L]_{I,A} \approx \frac{([R]_{total} - [R:BP:L]_{I,A})([L:BP] - [R:BP:L]_{I,A})}{K_{I,A}}, \quad (8)$$

where  $K_{I,A}$  is the dissociation constant between the inactive (or active) receptor, R, and the maltose-binding protein complex, L:BP. We expand Eq. 8 to the form of a quadratic equation and take its positive root as the solution for  $[R:BP:L]_{I,A}$ . As we will find below, it is this new, quadratic functional form for the concentration of bound receptors that enables good fits to the data.

The transport-and-sensing model solves for the free-energy difference (Eq. 2) in terms of the substrate transport kinetics and abundances of substrate, receptors, and binding proteins (Eqs. 3–8). Compared with the indirect-binding chemotaxis model (19), the transport-and-sensing model introduces four new parameters, which describe the Michaelis-Menten kinetics of the transport of maltose into the periplasm from the extracellular environment ( $K_p$ ,  $V_p$ ) and out of the periplasm and into the cytoplasm ( $K_c$ ,  $V_c$ ). Based on prior observations, we set  $K_p = 10$  mM (43),  $K_c = 100$   $\mu$ M (44), and  $K_{BP} = 2$   $\mu$ M (32). We take as the free parameters the unknown receptor-binding constants,  $K_I$  and  $K_A$ , as well as the parameters that may potentially vary with cellular regulation,  $[R]_{total}$ ,  $n_{Tar}$ ,  $[BP]_{total}$ , and  $V_c/V_p$ . To obtain a predictive model of maltose chemotaxis, we fit these free parameters to experimental data.

## *E. coli*'s population-level chemotactic response to maltose

We conducted chemotaxis experiments using a three-channel microfluidic device. The device creates steady, linearly varying concentrations of one or more chemoattractants within a central test channel by flowing two distinct concentrations of the chemoattractants in two source channels located on either side of the test channel and relying on diffusion through the hydrogel barrier in between (45,46) (Fig. 2; Materials and methods). To create environments with linear concentration profiles of maltose, we placed a buffer solution with no maltose in the right source channel and a solution containing maltose in the left source channel.

To simplify population-level modeling of the experimental observations, we took several precautions with our experiments. We ensured that the cell densities were sufficiently low and the media flow rate sufficiently high so that maltose consumption by the cells was negligible (Materials and methods). We also ensured that the maltose-binding protein (MalE) concentrations did not vary over the experiments, as the *mal* regulon is induced by maltose (47). Indeed, a Western-blot analysis of MalE showed no difference in the population-averaged MalE expression levels over the range of maltose concentrations tested for the short duration of our experiments (Fig. S1; Materials and methods).

The cells showed a measurable chemotactic response within a narrow range of maltose gradients created from

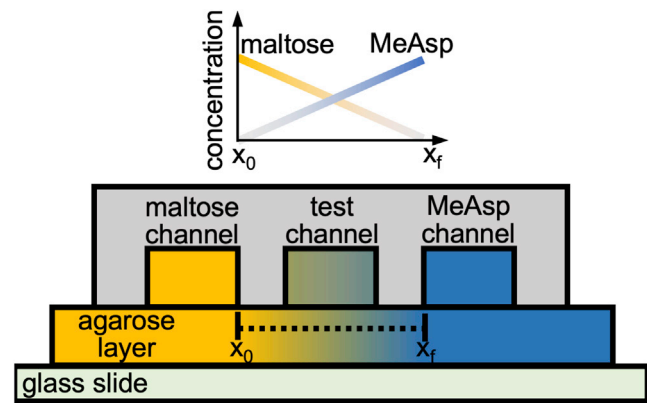

FIGURE 2 Side view of the three-channel microfluidic device used to expose cells to constant chemoattractant gradients. The channels, fabricated in solute-impermeable polydimethylsiloxane, were 20-mm long, 100- $\mu$ m deep, and 600- $\mu$ m wide, with 400- $\mu$ m spacing between each channel. The agarose layer was 0.5-mm thick. Motility medium with a constant maltose concentration was flowed through the left outer channel, and motility medium with a constant MeAsp concentration was flowed through the right outer channel. For the opposing-gradient experiments, both the maltose and MeAsp concentrations were nonzero; for the single-gradient experiments, one of the two outer channels contained only motility medium. The chemoattractants diffused through the agarose layer and up into the test channel, creating two steady linear concentration profiles in opposite directions. This figure was adapted from (46). To see this figure in color, go online.

approximately 0.2 to 20  $\mu\text{M}$  of maltose in the left source channel. The cells showed a strong peak response at 4  $\mu\text{M}$  of maltose (Fig. 3A; Materials and methods).

To help constrain our model fits, we further measured the chemotactic response in gradients of MeAsp and opposing gradients of maltose and MeAsp because the MeAsp chemotaxis system is so well studied and also relies on the receptor Tar. These additional measurements ensured that our fitting protocol obtained values for the dissociation constants between inactive and active Tar and MeAsp,  $K_{I,\text{MeAsp}}$ , and  $K_{A,\text{MeAsp}}$ , as well as for the receptor cooperativity,  $n_{\text{Tar}}$ , that matched estimates from previous work. Crucially, both the maltose and MeAsp chemotactic responses are very sensitive to  $n_{\text{Tar}}$ , so that fixing  $n_{\text{Tar}}$  using the MeAsp and opposing-gradient data

constrained the maltose chemotaxis parameters (Materials and methods). To create gradients of MeAsp and opposing gradients of maltose and MeAsp, we replaced the buffer solution in the right source channel with a solution containing MeAsp. The response in single gradients of MeAsp match previous assays (Fig. 3B) (48). In the opposing gradients, depending on the concentrations of the two chemoattractants in these opposing-gradient environments, the cells either favored one substrate over the other and accumulated on one side of the test channel or were indifferent to the combination of opposing gradients and had a flat distribution across the test channel (Fig. 3C and D). Under the culture conditions tested, a flat distribution was observed in opposing gradients created by 2  $\mu\text{M}$  of maltose and 6–8  $\mu\text{M}$  of MeAsp.

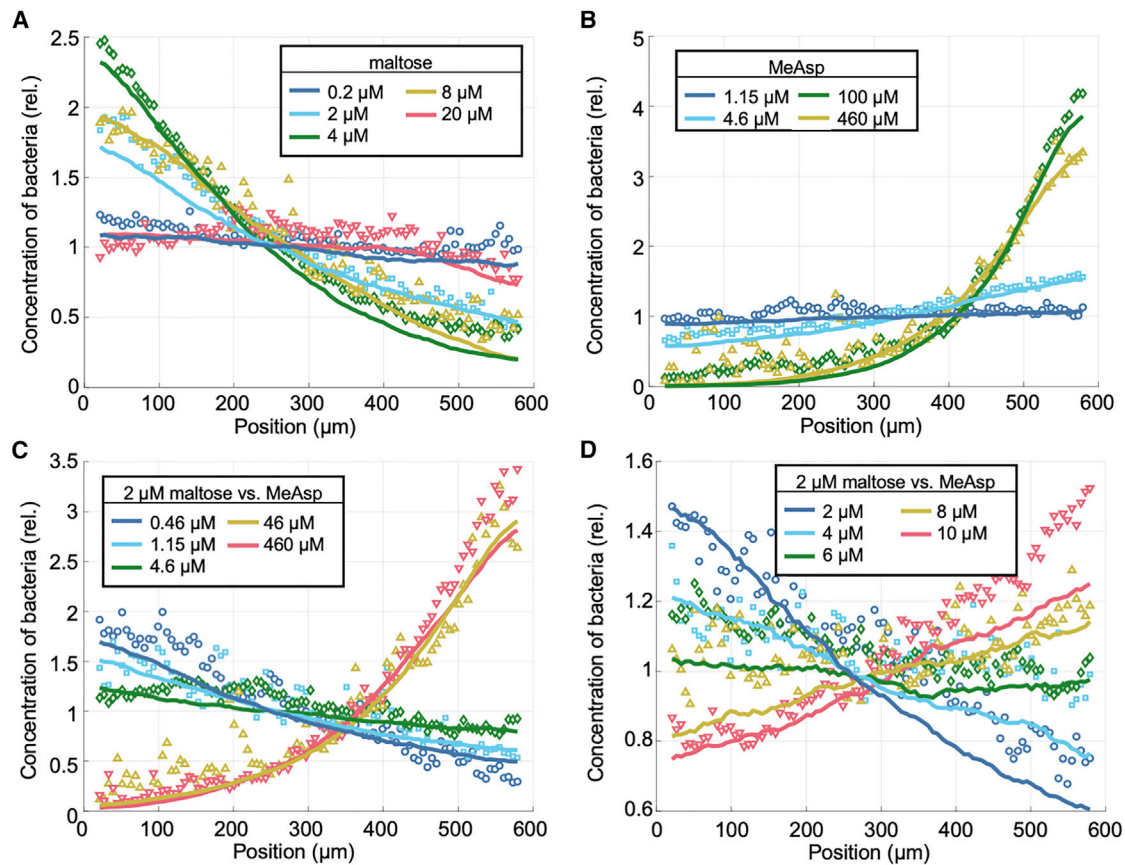

FIGURE 3 Steady-state distributions from experimental chemotaxis assays in single and opposing gradients of MeAsp and maltose along with the best fits obtained from parameter sweeps of SPECS with the transport-and-sensing model. Each experimental distribution of the relative concentration of bacteria was obtained using the bacterial positions measured over all channel locations and biological replicates (Materials and methods). In each plot, the maximal maltose concentration is at position  $x = 0 \mu\text{m}$ , and the maximal MeAsp concentration is at position  $x = 600 \mu\text{m}$ . Legends give the chemoattractant concentrations in the outer channels. To quantify each averaged response, we use the chemotaxis migration coefficient (CMC), which is defined as  $\text{CMC} = \frac{\langle x \rangle - 300}{300}$ , where  $\langle x \rangle$  is the average position in microns of the cells across the 600- $\mu\text{m}$  channel. (A) Single-gradient maltose experiments. CMC values = -0.022 (0.2  $\mu\text{M}$  maltose), -0.22 (2  $\mu\text{M}$  maltose), -0.33 (4  $\mu\text{M}$  maltose), -0.25 (8  $\mu\text{M}$  maltose), and -0.016 (20  $\mu\text{M}$  maltose). (B) Single-gradient MeAsp experiments. CMC values = 0.030 (1.15  $\mu\text{M}$  MeAsp), 0.16 (4.6  $\mu\text{M}$  MeAsp), 0.55 (100  $\mu\text{M}$  MeAsp), and 0.48 (460  $\mu\text{M}$  MeAsp). (C) Opposing-gradient experiments with 2  $\mu\text{M}$  of maltose in the left outer channel and various MeAsp concentrations in the right outer channel. CMC values = -0.26 (0.46  $\mu\text{M}$  MeAsp), -0.14 (1.15  $\mu\text{M}$  MeAsp), -0.061 (4.6  $\mu\text{M}$  MeAsp), 0.45 (46  $\mu\text{M}$  MeAsp), and 0.52 (460  $\mu\text{M}$  MeAsp). (D) Additional opposing-gradient experiments with 2  $\mu\text{M}$  maltose in the left outer channel and further intermediate MeAsp concentrations in the right outer channel. CMC values = -0.10 (2  $\mu\text{M}$  MeAsp), -0.022 (4  $\mu\text{M}$  MeAsp), -0.021 (6  $\mu\text{M}$  MeAsp), 0.032 (8  $\mu\text{M}$  MeAsp), and 0.13 (10  $\mu\text{M}$  MeAsp). To see this figure in color, go online.



## Fitting the model to molecular-level data

We first fit the transport-and-sensing model directly to molecular-level data from previous FRET assays of the *E. coli* LJ110 strain (19). For this fitting, we used the data from the attractant dose response as well as of the dynamic range in response to three-fold steps of attractant additions (Materials and methods; Fig. S10). We found two different parameter fits that can well describe the FRET assays. One fit predicts protein abundances that match estimates obtained from various previous experimental measurements (Fig. S10). However, similar to the original indirect-binding model fitted to the FRET data (19), this fit predicts that the dissociation constants of the bound maltose-binding protein to active and inactive Tar ( $K_{I(A), \text{Mal}}$ ) are in the millimolar regime, whereas direct measurements of the dissociation constants demonstrated that their values are in the micromolar regime (49).

The second fit achieves dissociation constants that more closely match the measured micromolar values (49) but predicts the concentration of binding protein to be approximately 100  $\mu\text{M}$ , a factor of ten lower than previous estimates (23,47). It is possible that the maltose-binding-protein concentrations were indeed on the order of 100  $\mu\text{M}$  for the strain and culture conditions used in the FRET assays, as this hypothesis is supported by additional FRET assays that showed an increase in chemotactic sensitivity with an increase in binding protein abundance from an inducible plasmid (19). Our model predicts that increasing binding-protein concentration from a baseline value of 100  $\mu\text{M}$  does indeed increase chemotactic sensitivity (Fig. S11). We therefore conclude that our transport-and-sensing model is consistent with the molecular-level FRET data.

However, we were unable to use these molecular-level fits to directly predict the population-level response of our chemotaxis assays because of a crucial discrepancy: the FRET assays show a larger dynamic sensing range than our chemotaxis assays (Figs. 3 and S12). We hypothesize that this may be due to differences in experimental conditions or to differences between strain LJ110 used for the FRET assays and strain RP437 used for our chemotaxis assays. Therefore, we fit our transport-and-sensing model directly to the chemotaxis assays.

## Predicting the population-level response from a molecular-level understanding

We attempted to fit both the previous indirect-binding model and our transport-and-sensing model directly to the observed population-level responses by incorporating these molecular-level models into a modified version of the agent-based simulator SPECS (18). This modified version accounts for multiple chemoattractant gradients (40,42) and allows the methylation level to saturate to capture imperfect adaptation (19) (Appendix S2; Materials and methods). Due to the intractability of running agent-based simulations

within an optimization program, we performed a series of parameter sweeps to find good fits (Materials and methods). For the transport-and-sensing model, we constrained the parameter ranges based on estimates from previous literature, whereas for the indirect-binding model, we conducted our search over various series of large sweeps. When fitting the indirect-binding model to our single-gradient maltose chemotaxis assays, we found no choice of parameter values that could capture both the narrow range of maltose sensing and the strong peak response at 4  $\mu\text{M}$  of maltose (Fig. S2; Materials and methods).

On the other hand, we were able to find a good fit to our chemotaxis assays using our transport-and-sensing model (Fig. 3; Materials and methods). We found that our transport-and-sensing model captures not only the steady-state cell distributions in the maltose single-gradient chemotaxis assays but also the steady-state cell distributions in the MeAsp experiments and in the opposing-gradient experiments, both of which we conducted to help us constrain our maltose parameter fits. This supports the validity of our model's assumption that transport is porin limited in the chemotactic regime.

Because our model is underdetermined, we obtained our fit by constraining the receptor cooperativity to  $n_{\text{Tar}} = 4$ , matching the finding that  $n_{\text{Tar}} = 6$  for *E. coli* strain LJ110 under similar culture conditions and that the Tar to serine receptor ratio is 1.5 times higher in strain LJ110 than in the strain we used, RP437 (19). In addition, to make the parameter sweep tractable, we used literature values for  $[\text{R}]_{\text{total}} = 20 \mu\text{M}$  (50) and  $[\text{BP}]_{\text{total}} = 1 \text{ mM}$  (23). With the three parameters thus constrained, our obtained fit is  $K_{I, \text{MeAsp}} = 26 \mu\text{M}$ ,  $K_{A, \text{MeAsp}} = 260 \mu\text{M}$ ,  $K_{I, \text{Mal}} = 12 \mu\text{M}$ ,  $K_{A, \text{Mal}} = 18 \mu\text{M}$ , and  $V_c/V_p = 7.5 \times 10^{-4}$  (Fig. 3). This fit supports our constraint that  $n_{\text{Tar}} = 4$ , as the dissociation constants of MeAsp to Tar closely match previous estimates of  $K_{I, \text{MeAsp}} = 30 \mu\text{M}$  and  $K_{A, \text{MeAsp}} = 500 \mu\text{M}$  (19) as well as our own fit from the FRET data of  $K_{I, \text{MeAsp}} = 27.5 \mu\text{M}$  and  $K_{A, \text{MeAsp}} = 365 \mu\text{M}$  (Fig. S10). Additionally, our estimates for the maltose-receptor binding constants ( $K_{I, \text{Mal}} = 12 \mu\text{M}$  and  $K_{A, \text{Mal}} = 18 \mu\text{M}$ ) reasonably match observations that these dissociation constants are in the micromolar range (49). Finally, our fit's estimate that  $V_c/V_p = 7.5 \times 10^{-4}$  is in line with a rough estimate that we obtained previously by fitting our maltose transport model to past experiments with  $V_c/V_p \approx 1 \times 10^{-4}$  (34). The consistency of all fitted parameter values with previous observations supports the validity of our transport-and-sensing model. For the obtained fit and taking  $[\text{L}]_{\text{ext}} = 1 \mu\text{M}$ , our model predicts that  $[\text{L}:\text{BP}] = 14.9 \mu\text{M}$  and  $[\text{L}]_p = 30.1 \text{ nM}$  (Fig. 4 A and B). This predicted nanomolar concentration of free maltose in the periplasm supports our understanding that maltose transport into the cell is severely porin limited in the chemotactic regime.

Because the transport-and-sensing model has one more free parameter than the indirect-binding model, it may not



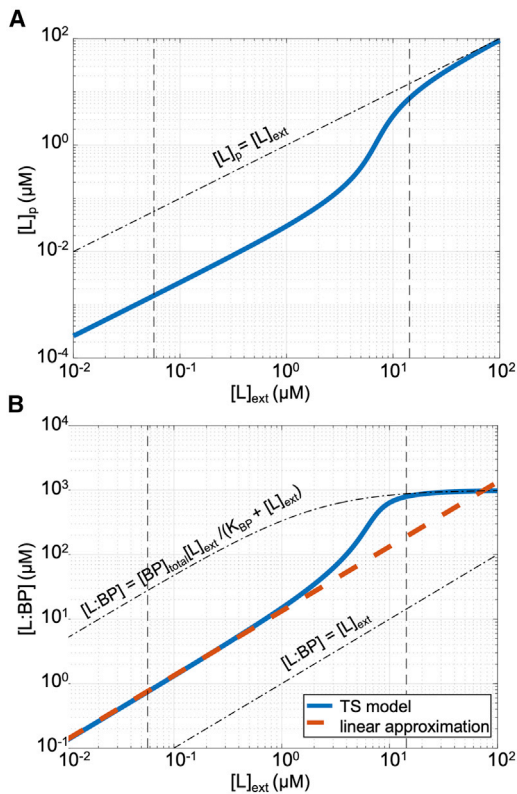

**FIGURE 4** Maltose transport. (A and B) The transport-and-sensing model's predictions of (A) periplasmic free maltose concentration,  $[L]_p$  and (B) maltose-binding protein complex concentration,  $[L:BP]$ , as a function of extracellular maltose concentration using best fit of chemotaxis assays from a parameter sweep. Vertical dashed lines show the minimum and maximum maltose concentrations experienced by cells in our experiments. Although the chemotactic signal  $[L:BP]$  has a sigmoidal form, it is linear for the majority of the chemotactic sensing range. Thus, we obtain good fits for the observed chemotactic response using the linear approximation (red dashed line)  $[L:BP] \approx \alpha[L]_{ext}$  with  $\alpha = (K_c/K_p)(V_p/V_c) = 13.3$ . Note that  $[L:BP]$  is about an order of magnitude higher than the external maltose concentration  $[L]_{ext}$  in the chemotactic regime and approaches  $[L:BP] \approx [BP]_{total}[L]_{ext}/(K_{BP} + [L]_{ext})$  at high external concentrations, where transport is no longer porin limited so  $[L]_p = [L]_{ext}$ . To see this figure in color, go online.

be surprising that it attains better fits (Figs. 3 and S2). However, we find that a modified version of the transport-and-sensing model with only three fitting parameters also captures most of the observed chemotactic response. Because our model predicts a linear relationship between the extracellular maltose concentration  $[L]_{ext}$  and the signal  $[L:BP]$  for the majority of the maltose-sensing range (Fig. 4 B), we additionally fit our data assuming  $[L:BP] = \alpha[L]_{ext}$  so that there are only three free parameters:  $K_I/\alpha$ ,  $K_A/\alpha$ , and  $[R]_{total}/\alpha$  (Appendix S1). The reduced model captures the observed responses except for the saturation of the response at 20  $\mu\text{M}$  maltose, which is due to the sigmoidal relationship between  $[L:BP]$  and  $[L]_{ext}$  (Figs. 4 B and S3).

The ability of our reduced model to capture most of the chemotactic response shows that the improved fit of our

full model is not due to increased degrees of freedom. Instead, the predictive power of the transport-and-sensing model is due to the new form of the model, specifically the quadratic form of the equation used to solve for the concentration of bound receptors (Eq. 8). This new form accounts for the dependence of limiting free attractant concentrations on receptor abundance and thereby demonstrates the importance of accounting for the relative rates of periplasmic and cytoplasmic transport to predict the chemotactic response.

### A tug of war between sensing and uptake explains *E. coli*'s narrow sensing range for maltose

Our fitted maltose transport model (Eqs. 5–7) indicates that maltose uptake becomes severely porin limited (i.e.,  $[L]_p \ll [L]_{ext}$ ) for extracellular maltose concentrations  $[L]_{ext} \approx 5 \mu\text{M}$  (Fig. 4 A), corroborating previous experimental work (32,33). If maltose transport were never limited by maltoporin abundance (so that  $[L]_p = [L]_{ext}$ ), we predict that, due to the high abundance of binding proteins, the affinity of maltose uptake could be approximately one order of magnitude higher (34), thus permitting higher uptake rates at lower extracellular maltose concentrations.

However, our chemotaxis model indicates that if the cell were to thus increase porin abundance to increase affinity, it would lose its ability to sense maltose gradients in the micromolar regime. Keeping all else equal but assuming that transport is not porin limited (so that  $[L:BP] \approx [BP]_{total}[L]_{ext}/(K_{BP} + [L]_{ext})$ ; Appendix S1), our model indicates that the chemoreceptors would saturate at lower extracellular maltose concentrations so that the dynamic sensing range would shift downward and the peak response would occur at  $\sim 200 \text{ nM}$  rather than  $\sim 4 \mu\text{M}$  maltose (Fig. S4). This would occur because the maltose-binding protein MalE is required for both uptake and sensing; thus, the uptake affinity and chemotactic sensitivity are tightly coupled. Therefore, if uptake saturates at lower extracellular concentrations, the chemotactic response saturates at lower concentrations as well.

There is thus a sensing-uptake trade-off. Although higher affinity allows higher uptake rates at low saccharide concentrations, it precludes the ability of bacteria to sense gradients of these nutrients at ecologically relevant micromolar concentrations. This tug of war between increasing affinity—by increasing outer-membrane permeability via increased maltoporin expression—and increasing sensing range by decreasing permeability (Fig. S5) provides an explanation for *E. coli*'s narrow sensing range for maltose.

### *E. coli*'s chemotactic response is insensitive to variations in binding-protein abundance

To test the ability of our transport-and-sensing model to predict how variable-protein expression levels affect the

chemotactic response of cells, we performed additional microfluidic experiments to compare the chemotactic response of cells from the original culture conditions—in which cells had no prior exposure to sugars—with the response of cells grown in medium supplemented with 500  $\mu\text{M}$  maltose. We conducted an opposing-gradient chemotaxis assay using concentrations of maltose (2  $\mu\text{M}$ ) and MeAsp (10  $\mu\text{M}$ ) for which neither chemoattractant response was saturated (Fig. 3 A and B). Counterintuitively, cells grown in maltose had a lower relative affinity to maltose than cells grown without maltose (Fig. 5 A). This was especially surprising because cells grown in maltose had greater maltose-binding-protein abundances. As quantified by Western blots, the abundances were nearly double the abundances measured when the cells were grown in the original media without maltose (Fig. S1). Interestingly, when we grew cells without maltose but that were harvested in late exponential phase, we found a very similar decrease in affinity for maltose relative to MeAsp (Fig. 5 A). At higher optical densities, Tar levels are elevated (51,52), and we also measured a similar increase in maltose-binding protein for cells grown on maltose and cells grown without maltose but that were harvested in stationary phase (Fig. S1).

The transport-and-sensing model correctly predicts this surprising change in relative affinity if we allow the parameter values to account for variation in *tar* expression. We found that if we only increase the MalE levels in our model, the distribution did not obtain a good fit (Fig. 5 A). However, when we assume that supplementing the growth medium with maltose, like harvesting at higher optical densities, increases the expression of Tar by 50% (51) and also assume that the cell maintains a constant ratio of maximal cytoplasmic and periplasmic uptake rates ( $V_c/V_p$ ) because *malK* and *lamB* are in the same operon (53), our model provides a good fit of the chemotactic response in opposing gradients (Fig. 5 A). Thus, although the chemotactic response to MeAsp does not depend on Tar expression levels because the free ligand concentration of MeAsp in the periplasm does not depend on receptor concentration, our model suggests that the relative chemotactic affinity to maltose is highly sensitive to variations in Tar abundance, though it is not sensitive to variations in MalE abundance. In fact, our model indicates that the chemotactic response to maltose is independent of binding-protein abundance, given that the abundance of binding protein is sufficiently high (Figs. 5 B and C, S6, and S7).

On the other hand, our model predicts that if transport were not porin limited (so that the periplasmic maltose concentration equals the extracellular concentration), the chemotactic response would be highly sensitive to binding-protein abundance (Figs. S7 and S8). This stark difference in sensitivity is apparent from the functional forms of the chemotactic signal  $[L:BP]$ . When transport is not

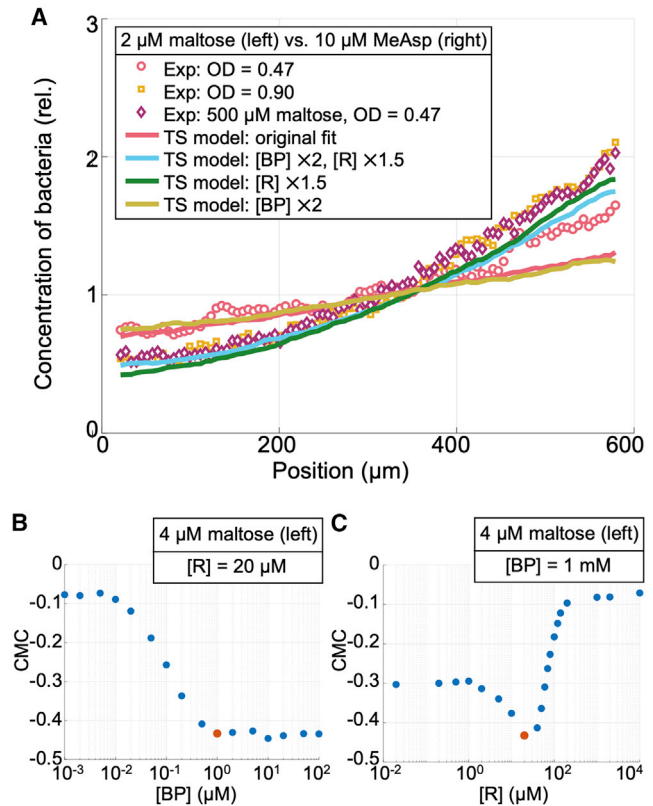

FIGURE 5 Sensitivity of chemotactic response to variations in binding protein and receptor abundances. (A) Steady-state distributions from experimental chemotaxis assays in opposing gradients created using 2  $\mu\text{M}$  maltose and 10  $\mu\text{M}$  MeAsp for cells obtained from different culture conditions. Cells were cultured in tryptone broth and harvested as in other experiments at mid-exponential phase (OD = 0.47), harvested at late-exponential phase (OD = 0.90) when the abundance of Tar is known to be higher, or cultured in tryptone broth supplemented with 500  $\mu\text{M}$  maltose and harvested at OD = 0.47 and then placed in the microfluidic chamber with 2  $\mu\text{M}$  maltose in the left channel and 10  $\mu\text{M}$  MeAsp in the right channel. Curves show fits obtained using an analytical approximation of the transport-and-sensing model, with variants modifying, by the specified factor, the concentration of MalE, [BP], and the concentration of Tar, [R]. Note that for increases in [R] by 50%, we also increased  $n_{\text{Tar}}$  by 50% to a value of  $n_{\text{Tar}} = 6$ . These results demonstrate that the relative chemotactic abundance is sensitive to Tar abundance but not to binding-protein abundance. For the cells grown under the three different conditions, the corresponding CMCs are CMC = 0.11 (OD = 0.47), 0.22 (OD = 0.90), and 0.22 (500  $\mu\text{M}$  maltose, OD = 0.47). (B and C) We use our fitted SPECS model to predict the peak chemotactic response, at 4  $\mu\text{M}$  maltose, as a function of both binding-protein abundance (with receptor abundance held constant at 20  $\mu\text{M}$ , B) and effective chemoreceptor abundance (with binding-protein abundance held constant at 1  $\text{mM}$ , C). Here, we plot the corresponding CMC values; see Figs. S6 and S7 for some of the predicted distributions of cells. Our model suggests that the chemotactic response does not vary for sufficiently high binding-protein abundances but is very sensitive to variations in receptor abundance. The red dots indicate the responses at 4  $\mu\text{M}$  maltose using our original estimate of the cells' average binding-protein abundance and receptor abundance when grown in tryptone and harvested at OD = 0.47. To see this figure in color, go online.

porin limited,  $[L:BP]$  is directly proportional to binding-protein abundance (Eq. 5; Appendix S1). However, in the case of porin limitation (Appendix S1; Fig. 4 B), we find

$$[L:BP] \approx \left(\frac{K_c}{K_p}\right) \left(\frac{V_p}{V_c}\right) [L]_{\text{ext}}, \quad (9)$$

which is independent of binding-protein abundance but is instead a function of the ratio of abundance of the LamB maltoporin to maltose ABC transport units, MalFGK<sub>2</sub>.

Because *lamB* and *malK* are adjacent genes in the same operon, we hypothesize that *E. coli* strain RP437 is “hard-wired” to maintain peak chemotactic sensitivity in the micromolar regime. Although protein abundances may vary greatly due to growth conditions and stochasticity, ratios in the abundances of proteins expressed from adjacent genes in the same operon vary much less (54). Therefore, our model predicts that in the porin-limited regime, the maltose chemotactic response is insensitive to variation in the levels of maltose transport proteins but very sensitive to variations in Tar expression levels.

## DISCUSSION

In this work, we developed a transport-and-sensing chemotaxis model, which, unlike previous molecular-level chemotaxis models, does not assume that the periplasmic concentration of a chemoattractant is equal to its extracellular concentration. Rather, it describes the rates of transport of maltose into and out of the periplasm to determine the concentration of maltose-bound MalE that can bind to receptors. This predictive, mechanistic model accurately captures how *E. coli*'s expression of maltose transport proteins affects its chemotactic response to maltose.

We fit the molecular-level parameters of our model both to previous FRET activity level assays of a mutant *E. coli* strain, LJ110  $\Delta(\text{cheY cheZ})$ , and also to our population-level, microfluidic chemotaxis experiments. Whereas both the original indirect-binding model and our transport-and-sensing model could explain the FRET data, we found that the indirect-binding model predicted Tar dissociation constants much higher than previously measured. Only our transport-and-sensing model could fit the FRET data with parameters consistent with previous literature and the data from microfluidic chemotaxis assays in gradients of maltose. This finding suggests the importance of considering porin-limited transport kinetics to predict population-level chemotactic response.

Previous work argued that because chemoreception occurs in the periplasm, rates of maltose transport into the cytoplasm can be drastically reduced without affecting maltose chemotaxis (22,28). Our work argues the opposite—that the kinetics of cytoplasmic relative to periplasmic transport is crucial to the chemotactic response. This novel understanding allows us to reinterpret previous experimental work, which found that *E. coli* cells with mutations in the MalFGK<sub>2</sub> transport proteins demonstrated a peak chemotactic response at lower extracellular concentrations

of maltose than wild-type cells (22). Our model suggests that the observed reduction is a direct consequence of the decreased cytoplasmic transport rates of the mutants. The decreased cytoplasmic transport rates increase the concentration of free maltose within the periplasm, causing the binding proteins to saturate at lower extracellular maltose concentrations and thus shifting the peak chemotactic response to lower maltose concentrations as well. To better substantiate this hypothesis and our model, future work should vary the ratio of maltoporins to transport proteins to determine how these variations affect the periplasmic maltose concentration and, thus, the chemotactic response.

The transport-and-sensing chemotaxis model provides insight into the roles of the outer membrane and high-affinity transport systems in the chemotactic response of gram-negative bacteria to substrates that do not quickly diffuse through general porins. This is the case for a variety of chemotaxis systems, such as chemotaxis of the pathogenic enteric bacteria *Campylobacter jejuni* to host glycans (55) and chemotaxis of marine *Vibrio* species to chitin (56). In contrast, note that this is not the case for the chemotaxis to other sugars sensed by *E. coli* via Trg and the glucose/galactose-binding protein. Because these sugars are sufficiently small to diffuse quickly through general porins, we expect their periplasmic concentration to be independent of receptor concentration and to match the extracellular concentration.

Our analysis of the model indicates that while binding proteins enable high-affinity uptake of a nutrient, they constrain the chemotactic response. Under low-nutrient conditions, in which cells rely on binding proteins for effective transport, the binding proteins capture the majority of the nutrient in the periplasm so that the free concentration is too low to be sensed directly. Therefore, the cell instead senses the nutrient-binding protein complex, and, thus, the uptake affinity is tightly coupled to chemotactic affinity, creating a sensing-uptake trade-off in which higher uptake affinities result in lower chemotactic sensing ranges.

However, we surprisingly found that when transport is porin limited, the chemotactic response is insensitive to small variations in the abundance of binding protein. Instead, our model shows that the chemotactic response is highly sensitive to the ratio of porins to transport units. Yet, in the case of *E. coli*'s maltose transport system, these two proteins are transcriptionally coregulated—which is also a common theme in the *E. coli* chemotaxis pathway (57)—so their ratio is expected to show little variation. This hypothesized robustness of the chemotactic response to variations in maltose-transport-protein expression levels suggests that *E. coli* may have evolved to maintain a maltose sensing range that is independent of transport rates. Thus, we hypothesize that *E. coli* may use maltose not only as a nutrient but also as an environmental cue. This is in contrast to *Salmonella typhimurium*, which, despite having a similar aspartate receptor and maltose-binding protein, cannot perform chemotaxis to maltose, although it transports and



metabolizes it (58,59). It is perhaps because maltose acts as an environmental cue that *E. coli* uses the major receptor Tar rather than the minor receptor Trg to sense maltose separately from all other sugars. However, further work is needed to verify whether *E. coli* cells do, in fact, maintain an invariant sensing range for maltose over a variety of transport conditions.

Understanding the precise role that maltose plays as an environmental cue is complicated by the fact that, in the natural environment, the maltoporin allows for the entry into the periplasm of not just maltose but also maltodextrins of varying lengths that can also bind to the maltose-binding protein MalE. Whereas maltodextrins as long as maltohexaose can be transported directly into the cytoplasm, longer maltodextrins cannot, so *E. coli* uses a periplasmic amylase to preferentially cleave maltohexaose from the larger dextrins (60). To our knowledge, it is unknown how the affinity of the receptor Tar to MalE varies depending on the maltodextrin that is bound to MalE. However, assuming that Tar can sense MalE bound to maltodextrins including maltohexaose and that maltose may also be produced in the periplasm during the degradation of maltodextrins, predicting the chemotactic response in more realistic environments requires estimates of not only the ratios of cytoplasmic to periplasmic transport rates of the various maltodextrins but also the rate at which they are degraded in the periplasm. We thus hypothesize that the maltodextrin degradation and transport system has evolved to allow *E. coli* to use not only maltose but, in general, starch gradients as environmental cues. We furthermore hypothesize that, given the ability of *E. coli* to degrade maltodextrins in the periplasm, porin-limited transport is important for accurately sensing the starch gradients. If cytoplasmic transport was slow relative to periplasmic transport and degradation, maltodextrins could accumulate to such an extent in the periplasm that they no longer reflect the extracellular concentration. To test these hypotheses, future work should conduct chemotaxis assays in more complex maltodextrin gradients with both wild-type *E. coli* and cells unable to perform maltose cytoplasmic transport.

Our model shows that while a gram-negative bacterium could use the abundance of a binding protein to tune the chemotactic response to growth and environmental conditions if transport were not porin limited, it can also make the chemotactic response independent of transport expression levels by making transport porin limited. Therefore, although the use of binding proteins limits chemotactic sensitivity and thus creates an uptake-sensing trade-off, it provides a variety of mechanisms for the cell to regulate its chemotactic sensitivity for chemoattractants based on ecologically relevant conditions.

## SUPPORTING MATERIAL

Supporting material can be found online at <https://doi.org/10.1016/j.bpj.2022.05.003>.

## AUTHOR CONTRIBUTIONS

N.N., E.F., and R.S. conceived the idea; N.N. and F.M. designed the assay experiments; N.N. and N.M.L. developed the model; Y.Y. developed the microfluidic device used for the assays; N.N. performed the chemotaxis experiments, analyzed the results, and fitted the model to the chemotaxis assays and previous FRET reporter assays; F.M., J.M.K., and V.I.F. contributed to data analysis; U.A. designed and performed the Western-blot experiments; N.N., U.A., J.M.K., F.M., N.M.L., V.I.F., and R.S. interpreted the results; and N.N., J.M.K., V.I.F., R.S., and N.M.L. wrote the paper.

## ACKNOWLEDGMENTS

The authors acknowledge the support of a Gordon and Betty Moore Foundation Marine Microbiology Initiative Investigator Award (grant 3783 to R.S.) and a grant from the Simons Foundation through the Principles of Microbial Ecosystems (PriME) collaboration (to R.S.). Contributions to the editing of this paper by Dr. Russell Naisbit are gratefully acknowledged. N.N. would also like to thank Professor Ned Wingreen for his invaluable feedback.

## DECLARATION OF INTERESTS

The authors declare no competing interests.

## REFERENCES

- Wadhwa, N., and H. C. Berg. 2021. Bacterial motility: machinery and mechanisms. *Nat. Rev. Microbiol.* 20:161–173. <https://doi.org/10.1038/s41579-021-00626-4>.
- Berg, H. C. 2004. *E. coli in Motion*. Springer-Verlag, New York.
- Stocker, R., and J. R. Seymour. 2012. Ecology and physics of bacterial chemotaxis in the ocean. *Microbiol. Mol. Biol. Rev.* 76:792–812. <https://doi.org/10.1128/mmb.00029-12>.
- Lovley, D. R. 2003. Cleaning up with genomics: applying molecular biology to bioremediation. *Nat. Rev. Microbiol.* 1:35–44. <https://doi.org/10.1038/nrmicro731>.
- Pandey, G., and R. K. Jain. 2002. Bacterial chemotaxis toward environmental pollutants: role in bioremediation. *Appl. Environ. Microbiol.* 68:5789–5795. <https://doi.org/10.1128/aem.68.12.5789-5795.2002>.
- Pieper, D. H., and W. Reineke. 2000. Engineering bacteria for bioremediation. *Curr. Opin. Biotechnol.* 11:262–270. [https://doi.org/10.1016/S0958-1669\(00\)00094-X](https://doi.org/10.1016/S0958-1669(00)00094-X).
- Anderson, J. C., E. J. Clarke, ..., C. A. Voigt. 2006. Environmentally controlled invasion of cancer cells by engineered bacteria. *J. Mol. Biol.* 355:619–627. <https://doi.org/10.1016/j.jmb.2005.10.076>.
- Forbes, N. S. 2010. Engineering the perfect (bacterial) cancer therapy. *Nat. Rev. Cancer.* 10:785–794. <https://doi.org/10.1038/nrc2934>.
- Yang, Y., A. M. Pollard, ..., V. Sourjik. 2015. Relation between chemotaxis and consumption of amino acids in bacteria. *Mol. Microbiol.* 96:1272–1282. <https://doi.org/10.1111/mmi.13006>.
- Wong-Ng, J., A. Celani, and M. Vergassola. 2018. Exploring the function of bacterial chemotaxis. *Curr. Opin. Microbiol.* 45:16–21. <https://doi.org/10.1016/j.mib.2018.01.010>.
- Cremer, J., T. Honda, ..., T. Hwa. 2019. Chemotaxis as a navigation strategy to boost range expansion. *Nature.* 575:658–663. <https://doi.org/10.1038/s41586-019-1733-y>.
- Alon, U. 2006. *An Introduction to Systems Biology: Design Principles of Biological Circuits*. CRC Press. <https://doi.org/10.1201/9781420011432>.
- Barkai, N., and S. Leibler. 1997. Robustness in simple biochemical networks. *Nature.* 387:913–917. <https://doi.org/10.1038/43199>.



14. Bi, S., and V. Sourjik. 2018. Stimulus sensing and signal processing in bacterial chemotaxis. *Curr. Opin. Microbiol.* 45:22–29. <https://doi.org/10.1016/j.mib.2018.02.002>.
15. Bray, D., M. D. Levin, and C. J. Morton-Firth. 1998. Receptor clustering as a cellular mechanism to control sensitivity. *Nature.* 393:85–88. <https://doi.org/10.1038/30018>.
16. Falke, J. J., R. B. Bass, ..., M. A. Danielson. 1997. The two-component signaling pathway of bacterial chemotaxis: a molecular view of signal transduction by receptors, kinases, and adaptation enzymes. *Annu. Rev. Cell Dev. Biol.* 13:457–512. <https://doi.org/10.1146/annurev.cellbio.13.1.457>.
17. Parkinson, J. S., G. L. Hazelbauer, and J. J. Falke. 2015. Signaling and sensory adaptation in *Escherichia coli* chemoreceptors: 2015 update. *Trends Microbiol.* 23:257–266. <https://doi.org/10.1016/j.tim.2015.03.003>.
18. Jiang, L., Q. Ouyang, and Y. Tu. 2010. Quantitative modeling of *Escherichia coli* chemotactic motion in environments varying in space and time. *PLoS Comput. Biol.* 6:e1000735. <https://doi.org/10.1371/journal.pcbi.1000735>.
19. Neumann, S., C. H. Hansen, ..., V. Sourjik. 2010. Differences in signaling by directly and indirectly binding ligands in bacterial chemotaxis. *EMBO J.* 29:3484–3495. <https://doi.org/10.1038/emboj.2010.224>.
20. Mowbray, S. L., and D. E. Koshland. 1987. Additive and independent responses in a single receptor: aspartate and maltose stimuli on the tar protein. *Cell.* 50:171–180. [https://doi.org/10.1016/0092-8674\(87\)90213-3](https://doi.org/10.1016/0092-8674(87)90213-3).
21. Lazova, M. D., T. Ahmed, ..., T. S. Shimizu. 2011. Response rescaling in bacterial chemotaxis. *Proc. Natl. Acad. Sci. U S A.* 108:13870–13875. <https://doi.org/10.1073/pnas.1108608108>.
22. Hazelbauer, G. L. 1975. Maltose chemoreceptor of *Escherichia coli*. *J. Bacteriol.* 122:206–214. <https://doi.org/10.1128/jb.122.1.206-214.1975>.
23. Manson, M. D., W. Boos, ..., B. A. Rasmussen. 1985. Dependence of maltose transport and chemotaxis on the amount of maltose-binding protein. *J. Biol. Chem.* 260:9727–9733. [https://doi.org/10.1016/s0021-9258\(17\)39299-2](https://doi.org/10.1016/s0021-9258(17)39299-2).
24. Brass, J. M., M. D. Manson, and T. J. LARSONt. 1984. Transposon Tn10-dependent expression of the lamB gene in *Escherichia coli*. *J. Bacteriol.* 159:93–99. <https://doi.org/10.1128/jb.159.1.93-99.1984>.
25. Nikaïdo, H. 2003. Molecular basis of bacterial outer membrane permeability revisited. *Microbiol. Mol. Biol. Rev.* 67:593–656. <https://doi.org/10.1128/mubr.67.4.593-656.2003>.
26. Koch, A. L. 1997. Microbial physiology and ecology of slow growth. *Microbiol. Mol. Biol. Rev.* 61:305–318. <https://doi.org/10.1128/61.3.305-318.1997>.
27. Saier, M. H. 2000. Families of transmembrane sugar transport proteins. *Mol. Microbiol.* 35:699–710. <https://doi.org/10.1046/j.1365-2958.2000.01759.x>.
28. Hazelbauer, G. L. 1975. Role of the receptor for bacteriophage lambda in the functioning of the maltose chemoreceptor of *Escherichia coli*. *J. Bacteriol.* 124:119–126. <https://doi.org/10.1128/jb.124.1.119-126.1975>.
29. Ingham, C., M. Buechner, and J. Adler. 1990. Effect of outer membrane permeability on chemotaxis in *Escherichia coli*. *J. Bacteriol.* 172:3577–3583. <https://doi.org/10.1128/jb.172.7.3577-3583.1990>.
30. Wandersman, C., and M. Schwartz. 1982. Mutations that alter the transport function of the LamB protein in *Escherichia coli*. *J. Bacteriol.* 151:15–21. <https://doi.org/10.1128/jb.151.1.15-21.1982>.
31. Freundlieb, S., U. Ehmann, and W. Boos. 1988. Facilitated diffusion of p-nitrophenyl-alpha-D-maltohexaoside through the outer membrane of *Escherichia coli*. Characterization of LamB as a specific and saturable channel for maltooligosaccharides. *J. Biol. Chem.* 263:314–320. [https://doi.org/10.1016/s0021-9258\(19\)57394-x](https://doi.org/10.1016/s0021-9258(19)57394-x).
32. Hengge, R., and W. Boos. 1983. Maltose and lactose transport in *Escherichia coli*: examples of two different types of concentrative transport systems. *Biochim. Biophys. Acta.* 737:443–478. [https://doi.org/10.1016/0304-4157\(83\)90009-6](https://doi.org/10.1016/0304-4157(83)90009-6).
33. Nikaïdo, H. 1994. Maltose transport system of *Escherichia coli*: an ABC-type transporter. *FEBS Lett.* 346:55–58. [https://doi.org/10.1016/0014-5793\(94\)00315-7](https://doi.org/10.1016/0014-5793(94)00315-7).
34. Norris, N., N. M. Levine, ..., R. Stocker. 2021. Mechanistic model of nutrient uptake explains dichotomy between marine oligotrophic and copiotrophic bacteria. *PLoS Comput. Biol.* 17:e1009023. <https://doi.org/10.1371/journal.pcbi.1009023>.
35. Tan, P. Y., Marcos, and Y. Liu. 2020. Modelling bacterial chemotaxis for indirectly binding attractants. *J. Theor. Biol.* 487:110120. <https://doi.org/10.1016/j.jtbi.2019.110120>.
36. Klebba, P. E. 2002. Mechanism of maltodextrin transport through LamB. *Res. Microbiol.* 153:417–424. [https://doi.org/10.1016/s0923-2508\(02\)01340-2](https://doi.org/10.1016/s0923-2508(02)01340-2).
37. Tu, Y. 2013. Quantitative modeling of bacterial chemotaxis: signal amplification and accurate adaptation. *Annu. Rev. Biophys.* 42:337–359. <https://doi.org/10.1146/annurev-biophys-083012-130358>.
38. Bosdriesz, E., S. Magnúsdóttir, ..., D. Molenaar. 2015. Binding proteins enhance specific uptake rate by increasing the substrate-transporter encounter rate. *FEBS J.* 282:2394–2407. <https://doi.org/10.1111/febs.13289>.
39. Hart, Y., A. E. Mayo, ..., U. Alon. 2013. Comparing apples and oranges: fold-change detection of multiple simultaneous inputs. *PLoS One.* 8:e57455. <https://doi.org/10.1371/journal.pone.0057455>.
40. Keymer, J. E., R. G. Endres, ..., N. S. Wingreen. 2006. Chemosensing in *Escherichia coli*: two regimes of two-state receptors. *Proc. Natl. Acad. Sci. U S A.* 103:1786–1791. <https://doi.org/10.1073/pnas.0507438103>.
41. Lan, G., S. Schulmeister, ..., Y. Tu. 2011. Adapt locally and act globally: strategy to maintain high chemoreceptor sensitivity in complex environments. *Mol. Syst. Biol.* 7:475. <https://doi.org/10.1038/msb.2011.8>.
42. Mello, B. A., and Y. Tu. 2005. An allosteric model for heterogeneous receptor complexes: understanding bacterial chemotaxis responses to multiple stimuli. *Proc. Natl. Acad. Sci. U S A.* 102:17354–17359. <https://doi.org/10.1073/pnas.0506961102>.
43. Andersen, C., M. Jordy, and R. Benz. 1995. Evaluation of the rate constants of sugar transport through maltoporin (LamB) of *Escherichia coli* from the sugar-induced current noise. *J. Gen. Physiol.* 105:385–401. <https://doi.org/10.1085/jgp.105.3.385>.
44. Austermuhe, M. I., J. A. Hall, ..., A. L. Davidson. 2004. Maltose-binding protein is open in the catalytic transition state for ATP hydrolysis during maltose transport. *J. Biol. Chem.* 279:28243–28250. <https://doi.org/10.1074/jbc.m403508200>.
45. Ahmed, T., T. S. Shimizu, and R. Stocker. 2010. Bacterial chemotaxis in linear and nonlinear steady microfluidic gradients. *Nano Lett.* 10:3379–3385. <https://doi.org/10.1021/nl101204e>.
46. Yawata, Y., O. X. Cordero, ..., R. Stocker. 2014. Competition-dispersal tradeoff ecologically differentiates recently speciated marine bacterioplankton populations. *Proc. Natl. Acad. Sci. U S A.* 111:5622–5627. <https://doi.org/10.1073/pnas.1318943111>.
47. Schlegel, A., A. Bohm, ..., W. Boos. 2002. Network regulation of the *Escherichia coli* maltose system. *J. Mol. Microbiol. Biotechnol.* 4:301–307.
48. Kalinin, Y. V., L. Jiang, ..., M. Wu. 2009. Logarithmic sensing in *Escherichia coli* bacterial chemotaxis. *Biophysical J.* 96:2439–2448. <https://doi.org/10.1016/j.bpj.2008.10.027>.
49. Richarme, G. 1982. Interaction of the maltose-binding protein with membrane vesicles of *Escherichia coli*. *J. Bacteriol.* 149:662–667. <https://doi.org/10.1128/jb.149.2.662-667.1982>.
50. Stock, J. B. 1994. Adaptive responses in bacterial chemotaxis. In *Regulation of Cellular Signal Transduction Pathways by Desensitization and Amplification*. D. R. Sibley and M. D. Houslay, eds Wiley, New York, pp. 3–24.
51. Kalinin, Y., S. Neumann, ..., M. Wu. 2010. Responses of *Escherichia coli* bacteria to two opposing chemoattractant gradients depend on the chemoreceptor ratio. *J. Bacteriol.* 192:1796–1800. <https://doi.org/10.1128/jb.01507-09>.

52. Yoney, A., and H. Salman. 2015. Precision and variability in bacterial temperature sensing. *Biophysical J.* 108:2427–2436. <https://doi.org/10.1016/j.bpj.2015.04.016>.
53. Boos, W., and A. Böhm. 2000. Learning new tricks from an old dog: MalT of the *Escherichia coli* maltose system is part of a complex regulatory network. *Trends Genet.* 16:404–409. [https://doi.org/10.1016/s0168-9525\(00\)02086-2](https://doi.org/10.1016/s0168-9525(00)02086-2).
54. Zhao, J., H. Zhang, ..., G. Zhang. 2019. Multifaceted stoichiometry control of bacterial operons revealed by deep proteome quantification. *Front. Genet.* 10:473. <https://doi.org/10.3389/fgene.2019.00473>.
55. Day, C. J., R. M. King, ..., V. Korolik. 2016. A direct-sensing galactose chemoreceptor recently evolved in invasive strains of *Campylobacter jejuni*. *Nat. Commun.* 7:13206. <https://doi.org/10.1038/ncomms13206>.
56. Li, X., and S. Roseman. 2004. The chitinolytic cascade in *Vibrios* is regulated by chitin oligosaccharides and a two-component chitin catabolic sensor/kinase. *Proc. Natl. Acad. Sci. U S A.* 101:627–631. <https://doi.org/10.1073/pnas.0307645100>.
57. Kollmann, M., L. Løvdok, ..., V. Sourjik. 2005. Design principles of a bacterial signalling network. *Nature.* 438:504–507. <https://doi.org/10.1038/nature04228>.
58. Dahl, M. K., and M. D. Manson. 1985. Interspecific reconstitution of maltose transport and chemotaxis in *Escherichia coli* with maltose-binding protein from various enteric bacteria. *J. Bacteriol.* 164:1057–1063. <https://doi.org/10.1128/jb.164.3.1057-1063.1985>.
59. Mizuno, T., N. Mutoh, ..., Y. Imae. 1986. Acquisition of maltose chemotaxis in *Salmonella typhimurium* by the introduction of the *Escherichia coli* chemosensory transducer gene. *J. Bacteriol.* 165:890–895. <https://doi.org/10.1128/jb.165.3.890-895.1986>.
60. Boos, W., and H. Shuman. 1998. Maltose/maltodextrin system of *Escherichia coli*: transport, metabolism, and regulation. *Microbiol. Mol. Biol. Rev.* 62:204–229. <https://doi.org/10.1128/mubr.62.1.204-229.1998>.
61. Yang, Y., and V. Sourjik. 2012. Opposite responses by different chemoreceptors set a tunable preference point in *Escherichia coli* pH taxis. *Mol. Microbiol.* 86:1482–1489. <https://doi.org/10.1111/mmi.12070>.

**Biophysical Journal, Volume 121**

**Supplemental information**

**Bacterial chemotaxis to saccharides is governed by a trade-off between sensing and uptake**

**Noele Norris, Uria Alcolombri, Johannes M. Keegstra, Yutaka Yawata, Filippo Menolascina, Emilio Frazzoli, Naomi M. Levine, Vicente I. Fernandez, and Roman Stocker**

1 **Bacterial chemotaxis to saccharides is governed**  
2 **by a trade-off between sensing and uptake**

3 **Supplemental Material**

4 Noele Norris, Uria Alcolombri, Johannes M. Keegstra, Yutaka Yawata,  
5 Filippo Menolascina, Emilio Frazzoli, Naomi M. Levine, Vicente I. Fernandez, Roman Stocker

6 **Supplemental Appendix 1: A maltose transport model**

7 To describe the rate of maltose uptake into the cytoplasm, we use an ABC transport model and  
8 Michaelis-Menten approximation of ABC transport that we previously derived (Norris et al. 2021).  
9 Because it has been shown in *E. coli* that the abundance of the maltose binding protein greatly exceeds  
10 the abundance of transporters (Boos and Shuman 1998), the Michaelis-Menten approximation is valid.  
11 Therefore, we take the concentration of complex of maltose bound to the maltose binding protein to  
12 be:

13 
$$[\text{L}:\text{BP}] \approx [\text{BP}]_{\text{total}} \frac{[\text{L}]_{\text{p}}}{K_{\text{BP}} + [\text{L}]_{\text{p}}}$$
 (A-1)  
14

15 where  $[\text{BP}]_{\text{total}}$  is the total concentration of maltose binding protein in the periplasm;  $[\text{L}]_{\text{p}}$  is the con-  
16 centration of free maltose in the periplasm; and  $K_{\text{BP}}$  is the dissociation constant of maltose and maltose  
17 binding-protein.

18 We take the uptake rate of maltose into the cytoplasm to be

19 
$$v_{\text{c}} \approx V_{\text{c}} \frac{[\text{BP}]_{\text{total}}}{K_{\text{c}} + [\text{BP}]_{\text{total}}} \frac{[\text{L}]_{\text{p}}}{\frac{K_{\text{c}}K_{\text{BP}}}{K_{\text{c}} + [\text{BP}]_{\text{total}}} + [\text{L}]_{\text{p}}}, \quad V_{\text{c}} = k_2[\text{T}]_{\text{total}},$$
 (A-2)  
20

21 where:  $V_{\text{c}}$  is the maximal cytoplasmic uptake rate;  $K_{\text{c}}$  is the dissociation constant of the bound maltose-  
22 maltose binding protein complex and the transport unit;  $k_2$  is the turnover rate of the membrane-bound  
23 transport unit; and  $[\text{T}]_{\text{total}}$  is the total concentration of transport units in the periplasm.

24 While transport into the cytoplasm is active and thus can occur against concentration gradients,  
25 transport into the periplasm via porins is diffusive. Thus, while the cytoplasmic uptake rate has the  
26 above form, the periplasmic uptake rate is better described by the following Michaelis-Menten equation



27 (Bosdriesz et al. 2018):

28 
$$v_p \approx V_p \frac{[L]_{\text{ext}} - [L]_p}{K_p + [L]_{\text{ext}} + [L]_p}, \quad (\text{A-3})$$

29 where  $K_p$  is the half-saturation constant of the specific porin; and  $V_p$  is the maximal rate of uptake,  
30 which is a function of the number of expressed porins.

31 At steady-state, the periplasmic transport rate ( $v_p$ ) must be equal to the cytoplasmic transport rate  
32 ( $v_c$ ). Thus, we equate the rates from Equations A-2 and A-3 to solve for  $[L]_p$  as a function of  $[L]_{\text{ext}}$ .

### 33 **A linear approximation**

34 Analysis of the form of  $[L:\text{BP}]$  as a function of  $[L]_{\text{ext}}$  for the obtained parameter fits (Figure 4)  
35 shows that, for  $[L]_{\text{ext}} \lesssim 5 \mu\text{M}$ ,  $[L:\text{BP}]$  can be very well approximated by:

36 
$$[L:\text{BP}] = \alpha [L]_{\text{ext}}, \quad \alpha = \frac{K_c V_p}{K_p V_c}. \quad (\text{A-4})$$

37 This analytical approximation can be obtained by assuming that  $[L]_p \ll [L]_{\text{ext}}$  and demonstrates that,  
38 in the micromolar regime, chemotactic response is independent of binding protein abundance (Figures  
39 S7 & S8) and only dependent on the ratio of porin abundance to transport unit abundance.

## 40 Supplemental Appendix 2: A chemotaxis model

41 To model the chemotactic response of *E. coli* in mixed gradients of maltose and methyl-aspartate,  
 42 we extend the Signaling Pathway-based *E. coli* Chemotaxis Simulator (SPECS; Jiang et al. 2010) to  
 43 incorporate: (i) the heterogeneous MWC model (Keymer et al. 2006; Mello and Tu 2005) to consider  
 44 the chemotactic response of cells to multiple chemoattractants; and (ii) our new sensing-and-transport  
 45 model of chemotaxis to maltose that takes into account the transport kinetics of maltose into and out  
 46 of the periplasm, as well as the indirect binding of maltose to the aspartate receptor via the maltose-  
 47 binding protein.

48 Analogous to the derivation of the MWC model presented by Tu (2013), we derive the free energy  
 49 difference between the active and inactive states of a receptor cluster. We assume that the receptors in  
 50 a cluster are either all active or all inactive. A single receptor has four possible states: active ( $a = 1$ )  
 51 or inactive ( $a = 0$ ) and bound ( $l = 1$ ) or vacant ( $l = 0$ ), with probability,  $P(a, l)$ , where:

$$52 \quad \frac{P(1, 0)}{P(0, 0)} = e^{-f_m(m)}, \quad \frac{P(0, 1)}{P(0, 0)} = C_I, \quad \text{and} \quad \frac{P(1, 1)}{P(1, 0)} = C_A, \quad (\text{A-5})$$

53 where  $C_I$  and  $C_A$  are functions that we derive below.

54 Because the expected activity level of a single receptor is  $\langle a \rangle_{\text{receptor}} = P(1, 0) + P(1, 1)$  and  
 55  $P(0, 0) + P(0, 1) + P(1, 0) + P(1, 1) = 1$ ,

$$56 \quad \langle a \rangle_{\text{receptor}} = \frac{e^{-f_m(m)} [1 + C_A]}{1 + C_I + e^{-f_m(m)} (1 + C_A)}. \quad (\text{A-6})$$

57 We define the free energy difference,  $\Delta f$ , such that  $\langle a \rangle_{\text{receptor}} = (1 + e^{-\Delta f})^{-1}$ . Thus,

$$58 \quad \Delta f = -f_m(m) - \log \left[ \frac{1 + C_I}{1 + C_A} \right]. \quad (\text{A-7})$$

59 Because we assume that all of the  $n$  receptors are active or all of them are inactive, the expected activity  
 60 level of the entire receptor cluster is  $\langle a \rangle = (1 + e^{-n\Delta f})^{-1}$  (Phillips et al. 2012).

61 Therefore, a general formulation for the average activity level of a cell sensing chemoattractant L  
 62 is

$$63 \quad \langle a \rangle = \frac{1}{1 + e^{[nf_m(m) + nf_L([L])]}}, \quad f_L([L]) = \log \left[ \frac{1 + C_I}{1 + C_A} \right], \quad (\text{A-8})$$

64 where  $m$  is the methylation level and  $C_I (C_A)$  is the ratio of the probabilities of a receptor being bound  
 65 versus ligand-free for an inactive (respectively, active) receptor.

66 We first rederive the  $C$  term for MeAsp to demonstrate how the MWC model can be extended to de-  
 67 scribe maltose chemotaxis. By definition, the dissociation constant is  $K_{\text{MeAsp}} = [\text{R}]_{\text{free}}[\text{MeAsp}]/[\text{R:MeAsp}]$ ,  
 68 where  $[\text{R}]_{\text{free}}$  and  $[\text{MeAsp}]$  are the effective concentrations of free receptor and ligand in the periplasm  
 69 and  $[\text{R:MeAsp}]$  is the concentration of bound receptor. Defining  $[\text{R}] = [\text{R}]_{\text{free}} + [\text{R:MeAsp}]$ ,  $[\text{R:MeAsp}] =$   
 70  $[\text{R}][\text{MeAsp}] / (K_{\text{MeAsp}} + [\text{MeAsp}])$ . Thus, the probability a receptor is bound is

$$71 \quad P = \frac{[\text{R:MeAsp}]}{[\text{R}]} = \frac{[\text{MeAsp}]}{K_{\text{MeAsp}} + [\text{MeAsp}]}, \quad (\text{A-9})$$

72 so

$$73 \quad C = \frac{P}{1 - P} = \frac{[\text{MeAsp}]}{K_{\text{MeAsp}}}. \quad (\text{A-10})$$

74 Therefore, distinguishing an active from an inactive receptor,

$$75 \quad f_{\text{MeAsp}}([\text{MeAsp}]) = \log \left[ \frac{1 + [\text{MeAsp}]/K_{\text{I,MeAsp}}}{1 + [\text{MeAsp}]/K_{\text{A,MeAsp}}} \right]. \quad (\text{A-11})$$

76 Note that because MeAsp is not metabolized by the cell, the steady-state concentration of MeAsp in  
 77 the periplasm is equal to the extracellular concentration of MeAsp.

78 Adding sensing to the ABC transport model complicates an already complicated system. To sense  
 79 maltose, the receptors must compete with the ABC transporters to bind with the ligand-binding protein  
 80 complex. Optimally, however, sensing would minimally hinder transport to thus minimally decrease  
 81 the cell's growth rate. We thus make the simplifying assumption that sensing does not affect transport  
 82 but simply "reads" the state of the system. This is a reasonable approximation given that the abundance  
 83 of maltose-binding protein greatly exceeds the abundance of the cognate ABC transporter.

84 Therefore, we assume that the ABC transporters and receptors do not compete for the ligand-  
 85 binding protein complex and likewise assume that the receptors do not affect binding and dissociation  
 86 of the binding protein with maltose. Therefore, we modify the transport model to incorporate sensing  
 87 only via a simple modification to Equation A-1:

$$88 \quad [\text{L:BP}]_0 \equiv [\text{R:L:BP}] + [\text{L:BP}] \approx [\text{BP}]_{\text{total}} \frac{[\text{L}]_p}{K_{\text{BP}} + [\text{L}]_p}, \quad (\text{A-12})$$

89 where R:L:BP is the receptor bound to the ligand-binding protein complex.

90 We assume that the receptor can only bind to the complex and not to the binding protein on its own  
91 so that we can describe sensing by the following mass-action kinetics:

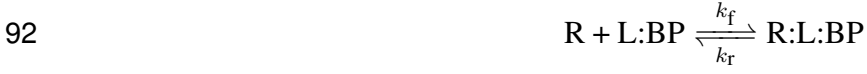

93 At steady-state, the concentration of the bound receptor does not change, so that

$$94 \quad [\text{R:L:BP}] = \frac{[\text{R}][\text{L:BP}]}{K}, \quad K = \frac{k_r}{k_f}. \quad (\text{A-13})$$

95 Combining Equations A-12 and A-13, we obtain that the total concentration of maltose-MBP com-  
96 plex bound to an inactive (I) or active (A) receptor is

$$97 \quad [\text{R:L:BP}]_{\text{I,A}} = \frac{([\text{R}]_{\text{total}} - [\text{R:L:BP}]_{\text{I,A}})([\text{L:BP}]_0 - [\text{R:L:BP}]_{\text{I,A}})}{K_{\text{I,A}}}, \quad (\text{A-14})$$

98 where  $K_{\text{I,A}} = K_{\text{I}}$  when all of the receptors in the cluster are inactive and  $K_{\text{I,A}} = K_{\text{A}}$  when all of the  
99 receptors are active. Therefore, the terms  $[\text{R:L:BP}]_{\text{I,A}}$  are the solutions to quadratic equations, and the  
100 free energy term for maltose is:

$$101 \quad f_{\text{Mal}}([\text{L}]_{\text{ext}}) = \log \left[ \frac{1 + C_{\text{I}}}{1 + C_{\text{A}}} \right], \quad C_{\text{I,A}} = \frac{[\text{R:L:BP}]_{\text{I,A}}}{[\text{R}]_{\text{total}} - [\text{R:L:BP}]_{\text{I,A}}}. \quad (\text{A-15})$$

102 We can use the Heterogeneous MWC (HMWC) model (Keymer et al. 2006; Mello and Tu 2005) to  
103 describe the average activity level in mixed gradients of MeAsp and maltose because MeAsp and the  
104 maltose-binding protein complex bind independently to distinct sites of Tar (Mowbray and Koshland  
105 1987):

$$106 \quad \langle a \rangle = \frac{1}{1 + e^{n_{\text{Tar}}[f_{\text{m}}(m) + f_{\text{MeAsp}}([\text{MeAsp})] + f_{\text{Mal}}([\text{L}]_{\text{ext}})]}. \quad (\text{A-16})$$



## 107 **References**

- 108 Boos, Winfried, and Howard Shuman. 1998. "Maltose/maltodextrin system of Escherichia coli: trans-  
109 port, metabolism, and regulation". *Microbiology and Molecular Biology Reviews* 62 (1): 204–229.  
110 <http://mibr.asm.org/content/62/1/204.short>.
- 111 Bosdriesz, Evert, et al. 2018. "Low affinity uniporter carrier proteins can increase net substrate up-  
112 take rate by reducing efflux". *Scientific Reports* 8 (1): 5576. ISSN: 2045-2322. doi:10.1038/  
113 s41598-018-23528-7. [https://www.nature.com/articles/s41598-018-](https://www.nature.com/articles/s41598-018-23528-7)  
114 [23528-7](https://www.nature.com/articles/s41598-018-23528-7).
- 115 Jiang, Lili, et al. 2010. "Quantitative Modeling of Escherichia coli Chemotactic Motion in Environ-  
116 ments Varying in Space and Time". *PLoS Comput Biol* 6 (4).
- 117 Keymer, Juan E, et al. 2006. "Chemosensing in Escherichia coli: Two regimes of two-state receptors".  
118 *Proceedings of the National Academy of Sciences* 103 (6): 1786–1791.
- 119 Mello, Bernardo A, and Yuhai Tu. 2005. "An allosteric model for heterogeneous receptor complexes:  
120 understanding bacterial chemotaxis responses to multiple stimuli". *Proceedings of the National*  
121 *Academy of Sciences* 102 (48): 17354–17359.
- 122 Mowbray, Sherry L., and Daniel E. Koshland. 1987. "Additive and independent responses in a single  
123 receptor: Aspartate and maltose stimuli on the tar protein". *Cell* 50 (2): 171–180. ISSN: 0092-8674.  
124 doi:10.1016/0092-8674(87)90213-3. [http://www.sciencedirect.com/  
125 science/article/pii/0092867487902133](http://www.sciencedirect.com/science/article/pii/0092867487902133).
- 126 Norris, Noele, et al. 2021. "Mechanistic model of nutrient uptake explains dichotomy between marine  
127 oligotrophic and copiotrophic bacteria". *PLOS Computational Biology* 17, no. 5 (): 1–21. doi:10.  
128 1371/journal.pcbi.1009023. [https://doi.org/10.1371/journal.pcbi.](https://doi.org/10.1371/journal.pcbi.1009023)  
129 [1009023](https://doi.org/10.1371/journal.pcbi.1009023).
- 130 Phillips, Rob, et al. 2012. "Bacterial Chemotaxis". In *Physical Biology of the Cell*, 872–883. Garland  
131 Science. ISBN: 978-1-134-11158-9.

157 **Supplemental Figures**

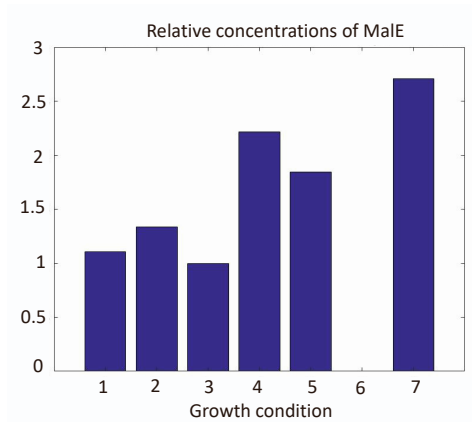

158

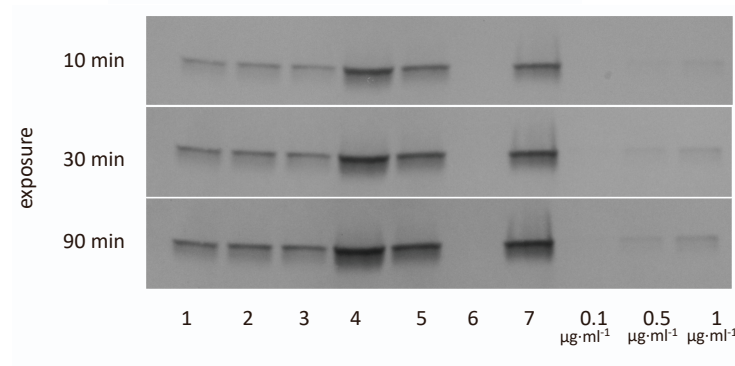

159

160 **Figure S1: Western blot for MalE.** The bar plot shows the relative concentration of MalE normalized by  
161 total protein concentrations over the following growth and experimental conditions: (1) wild-type cell  
162 grown in tryptone broth, put in solution without any maltose, (2) wild-type cell grown in tryptone broth,  
163 put in 1 µM maltose, (3) wild-type cell grown in tryptone broth, put in 10 µM maltose, (4) wild-type cell  
164 grown in tryptone broth and harvested at OD<sub>600</sub> = 0.9, put in 1 µM maltose, (5) wild-type cell grown in  
165 tryptone broth with 500 µM maltose, put in 1 µM maltose, (6) del-malE strain grown in tryptone broth  
166 with 500 µM maltose, put in 1 µM maltose, (7) del-tar strain grown in tryptone broth with 500 µM  
167 maltose, put in 1µM maltose. (8-10) three MalE concentrations. The loading volume was 10 µL for all  
168 samples. We conclude that MalE abundances were invariant over the experimental conditions shown in  
169 Figure 3 because abundances did not vary greatly over lanes 1-3. We estimated that supplementing the  
170 tryptone broth with maltose during growth doubled MalE abundance by comparing lanes 1 and 5.

171

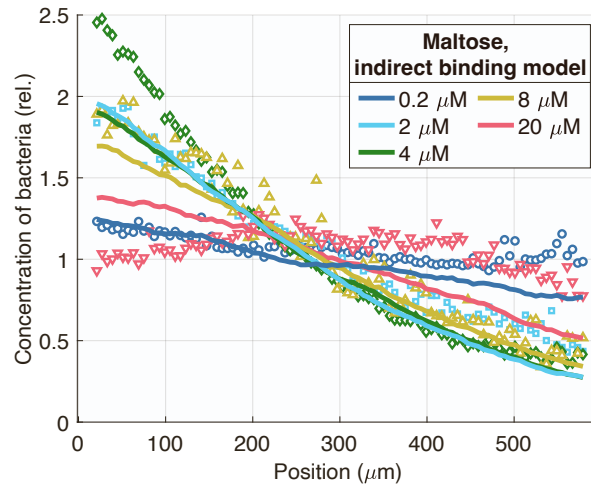

172

173 **Figure S2: Predicted steady-state distributions of cells using best fit of SPECS with**  
 174 **indirect-binding model.** Experimental cell distributions in maltose with predictions from  
 175 SPECS simulator incorporated with indirect-binding model and using best-fit parameters from  
 176 parameter sweep (Methods):  $n_{\text{Tar}} = 6$ ,  $K_{\text{BP}} = 2.6 \mu\text{M}$ ,  $K_{\text{I,Mal}}/[\text{BP}] = 0.8$ ,  $K_{\text{A,Mal}}/[\text{BP}] = 1.92$ , and  $p_0$   
 177  $= 0$ .

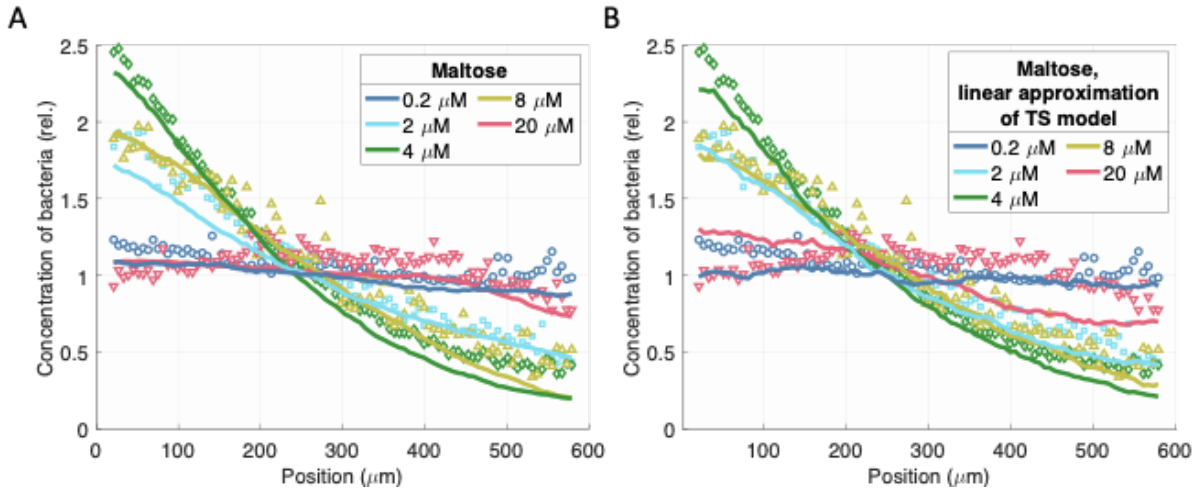

178

179 **Figure S3: The linear approximation of the transport-and-sensing model.** (A) Experimental  
 180 data and best fit using transport-and-sensing chemotaxis model. (B) Experimental data and best  
 181 fit using linear approximation of transport-and-sensing chemotaxis model, in which we assume  
 182  $[L:BP] \approx \alpha[L]_{\text{ext}}$ . The best-fit parameter values obtained from the parameter sweep are:  $K_I/\alpha =$   
 183  $0.72 \mu\text{M}$ ,  $K_A/\alpha = 1.18 \mu\text{M}$ , and  $[R]/\alpha = 1.18 \mu\text{M}$ . The linear approximation does not capture  
 184 the saturation of the response at  $20 \mu\text{M}$  maltose because our transport model suggests that  $[L:BP]$   
 185 is, in fact, a sigmoidal function of  $[L]_{\text{ext}}$  (Figure 4).

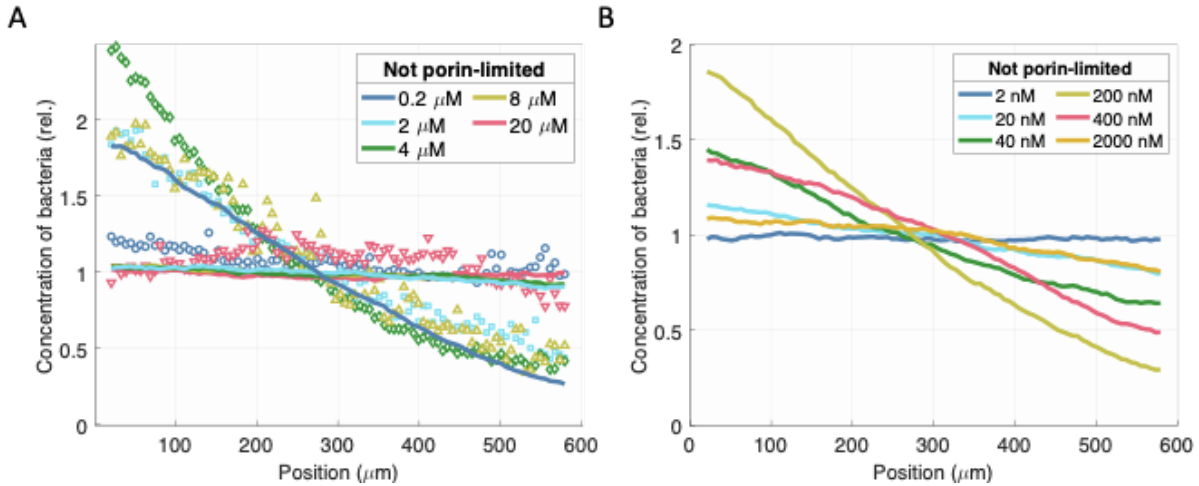

186

187 **Figure S4: Chemotactic response if transport were not porin-limited.** We obtained the above  
 188 plots using the fitted parameters of the transport-and-sensing chemotaxis model but incorrectly  
 189 assuming that  $[L]_p \approx [L]_{\text{ext}}$  so that  $[L:BP] \approx [BP]_{\text{total}}[L]_{\text{ext}}/(K_{BP} + [L]_{\text{ext}})$ . (A) We plot the  
 190 experimental data for reference. When we assume that transport is no longer porin-limited, our  
 191 model predicts that the cell can no longer sense gradients in the micromolar regime. (B) Instead,  
 192 its chemotactic sensitivity has shifted down to the nanomolar regime.



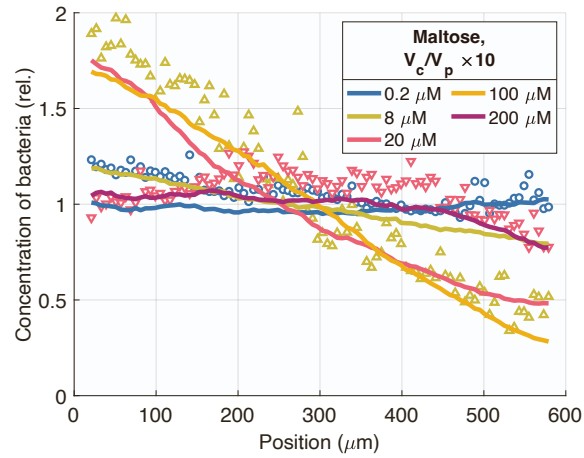

193

194 **Figure S5: Increasing the dynamic sensing range by decreasing outer-membrane**  
 195 **permeability.** If the cell further decreased maltoporin abundance to make transport even more  
 196 porin-limited, it could increase its dynamic sensing range. However, this would decrease uptake  
 197 affinity. We hypothesize that this trade-off between sensing range and uptake affinity may  
 198 explain *E. coli*'s narrow sensing range for maltose.

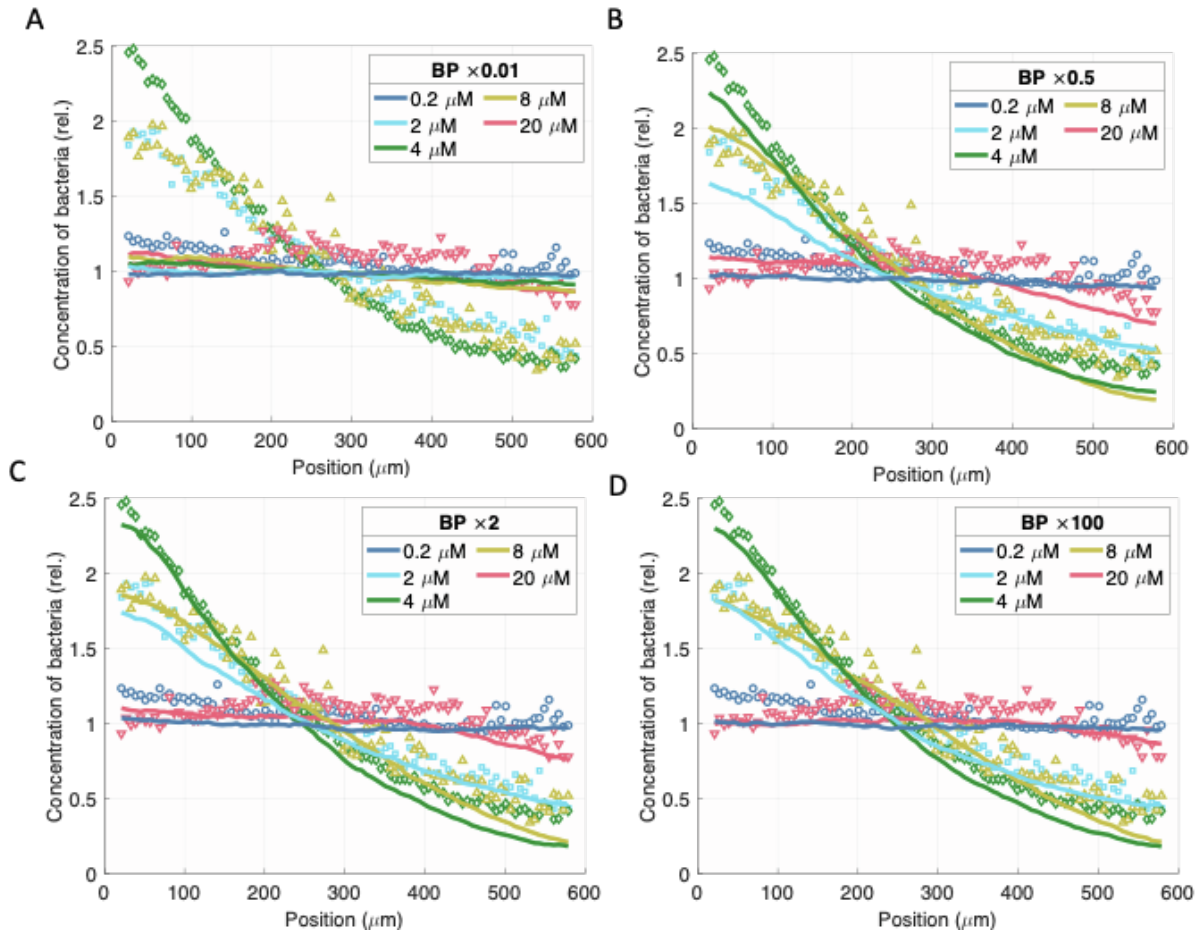

199

200 **Figure S6: Insensitivity of chemotactic response to binding protein abundance.** Although  
 201 the chemotactic response disappears when the binding protein abundance, [BP], is drastically  
 202 reduced by a factor of 100 (A), the chemotactic response is insensitive to both smaller variations  
 203 in abundance (B) and increases in binding protein abundance (C&D). This insensitivity to  
 204 binding protein abundance can be easily seen from the linear approximation of the chemotactic  
 205 signal,  $[L:BP]$ , as a function of  $[L]_{\text{ext}}$ : it is independent of [BP].

206

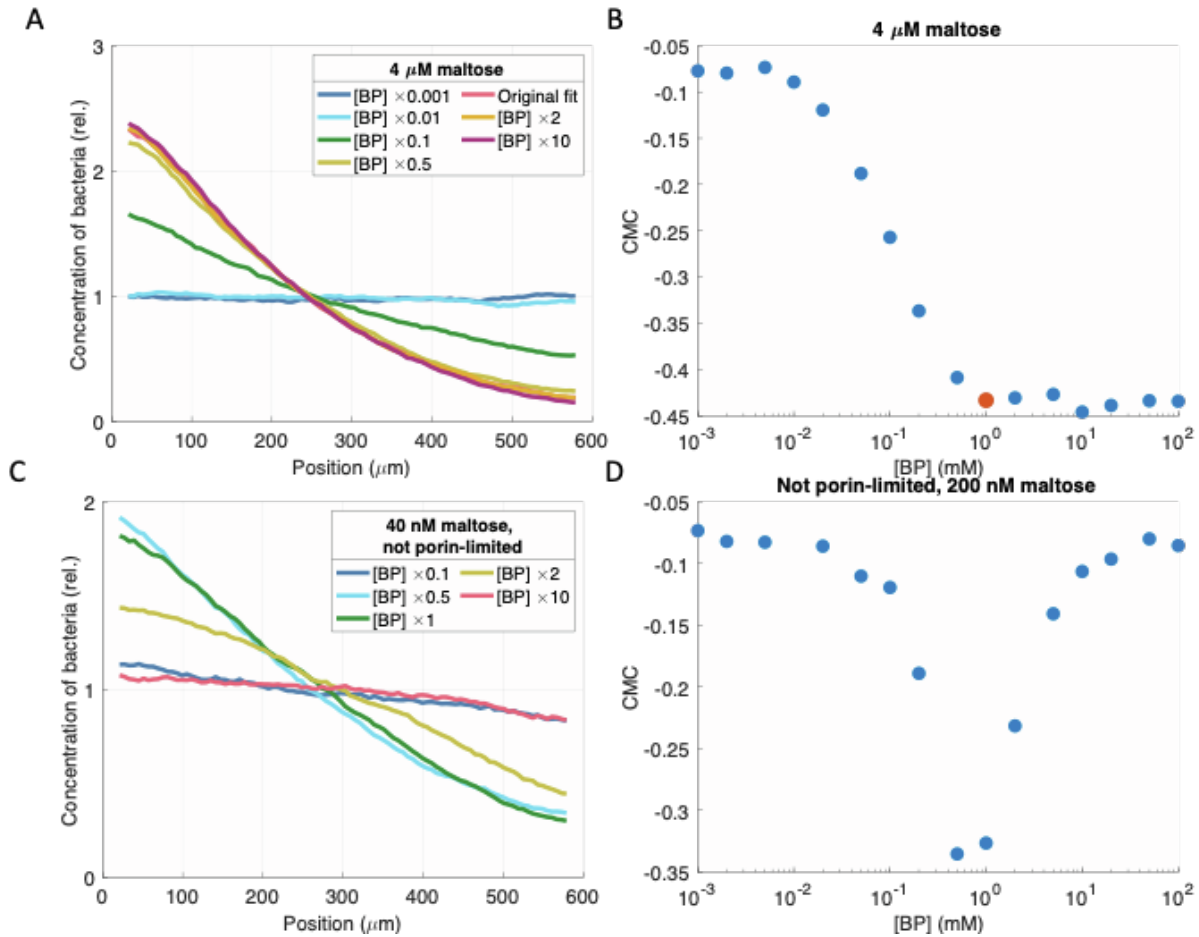

217

218 **Figure S7: Sensitivity of response to binding protein abundance.** Here we use our fitted  
 219 SPECS model to predict the peak chemotactic response as a function of binding protein  
 220 abundance. To quantify the response, we use the chemotaxis migration coefficient (CMC), which  
 221 is defined as  $\text{CMC} = \frac{\langle x \rangle - 300}{300}$ , where  $\langle x \rangle$  is the average position in microns of the cells across the  
 222 600  $\mu\text{m}$  channel. (A&B) Our model suggests that the CMC does not vary for sufficiently high  
 223 binding protein abundances. The red dot indicates our estimate of the cells' average binding  
 224 protein abundance and corresponding response at 4  $\mu\text{M}$  maltose. (C&D) On the other hand, if  
 225 instead transport were not porin-limited, the response would be highly sensitive to binding  
 226 protein abundance.

217

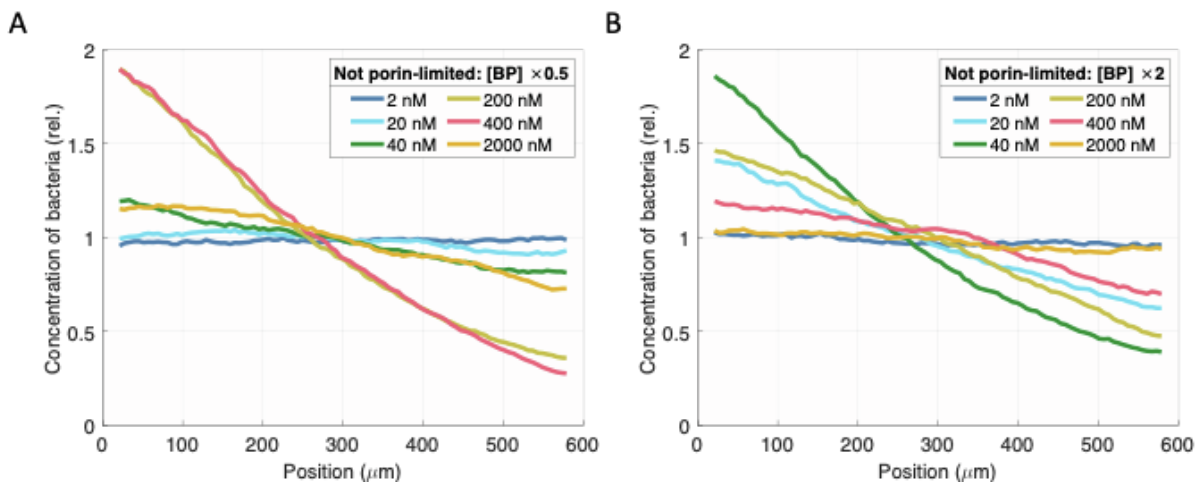

218

219 **Figure S8: Sensitivity of the chemotactic response to binding protein abundance when**  
220 **transport is not porin-limited.** If instead transport were not porin-limited so that  $[L]_p \approx [L]_{\text{ext}}$ ,  
221 then the chemotactic response would be proportional to binding protein abundance and thus the  
222 response would be highly sensitive to variations in binding protein abundance.

223 A

B

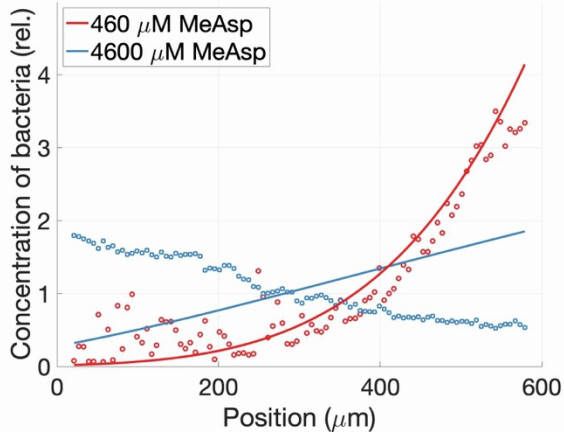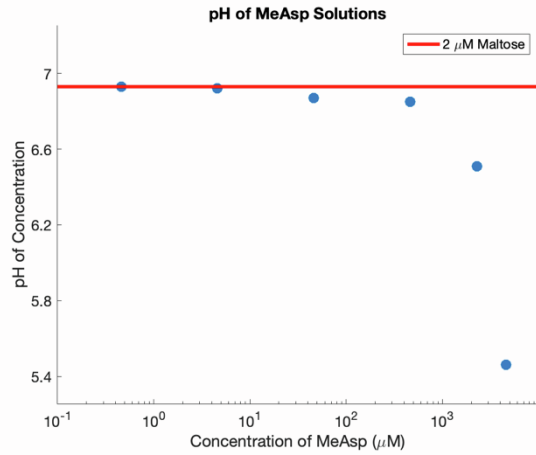

224

225

226 **Figure S9: Cells are repelled from high concentrations of MeAsp. (A) Steady-state**

227 distributions from experimental chemotaxis assays in gradients of MeAsp along with predicted

228 best-fit using analytical approximation with direct-binding model. (B) pH of MeAsp solutions

229 used in experiments. Because we suspect pH taxis causes repulsion (Hu & Tu, 2014), we

230 restricted our model fitting to concentrations of MeAsp less than 500 μM.



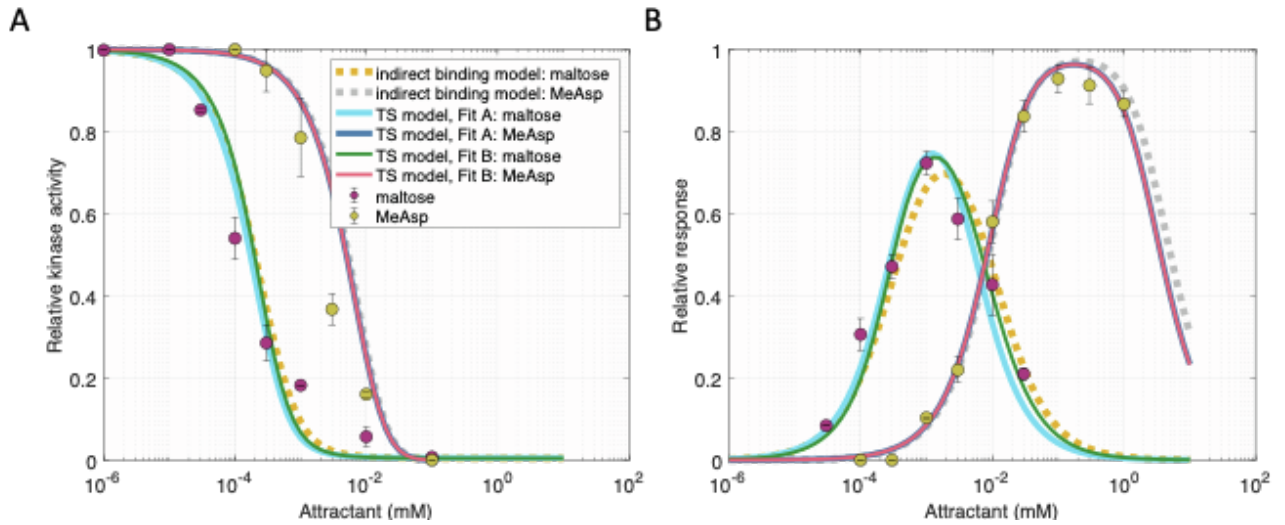

231

232 **Figure S10: Fitting the transport-and-sensing model to FRET activity assays.** Here we  
 233 compare the best fits obtained by Neumann *et al.* using their indirect binding model and best fits  
 234 we obtained using our transport-and-sensing (TS) model (Methods). The FRET assay data in (A)  
 235 shows the dose response of *E. coli* LJ110  $\Delta(\text{cheY cheZ})$  to step additions of maltose or methyl-  
 236 aspartate (MeAsp), and (B) shows the dynamic range to three-fold step additions, during which  
 237 the cells were adapted prior to each new addition (Neumann *et al.*, 2010). The indirect-binding  
 238 model assumes that the periplasmic concentration of free maltose equals the extracellular  
 239 concentration, and its fit is with receptor cooperativity  $n_{\text{Tar}} = 6$ , binding protein dissociation  
 240 constant  $K_{\text{BP}} = 2 \mu\text{M}$ , dissociation constant to binding protein ratios  $K_{\text{I,Mal}}/[\text{BP}] = 0.4$  and  
 241  $K_{\text{A,Mal}}/[\text{BP}] = 6$ , and methyl-aspartate dissociation constants  $K_{\text{I,MeAsp}} = 30 \mu\text{M}$  and  
 242  $K_{\text{A,MeAsp}} = 500 \mu\text{M}$ . Fit A of our transport-and-sensing (TS) model uses parameters:  $n_{\text{Tar}} = 6$ ,  $K_{\text{I,MeAsp}}$   
 243  $\text{MeAsp} = 27.5 \mu\text{M}$ ,  $K_{\text{A,MeAsp}} = 365 \mu\text{M}$ ,  $K_{\text{I,Mal}} = 14.4 \mu\text{M}$ ,  $K_{\text{A,Mal}} = 49.7 \mu\text{M}$ ,  $[\text{R}]_{\text{total}} = 12.6 \mu\text{M}$ ,  
 244  $[\text{BP}]_{\text{total}} = 101 \mu\text{M}$ , and  $V_{\text{c}}/V_{\text{p}} = 1.09 \times 10^{-5}$ . Fit B uses parameters:  $n_{\text{Tar}} = 6$ ,  $K_{\text{I,MeAsp}} = 27.5 \mu\text{M}$ ,  
 245  $K_{\text{A,MeAsp}} = 363 \mu\text{M}$ ,  $K_{\text{I,Mal}} = 394 \mu\text{M}$ ,  $K_{\text{A,Mal}} = 2,040 \mu\text{M}$ ,  $[\text{R}]_{\text{total}} = 21.0 \mu\text{M}$ ,  $[\text{BP}]_{\text{total}} = 1290 \mu\text{M}$ ,

246 and  $V_c/V_p = 1.00 \times 10^{-5}$ . Fit A correctly predicts maltose-Tar dissociation constants in the  
247 micromolar range but predicts low binding protein abundances. On the other hand, Fit B predicts  
248 reasonable protein abundances but much too high dissociation constants.

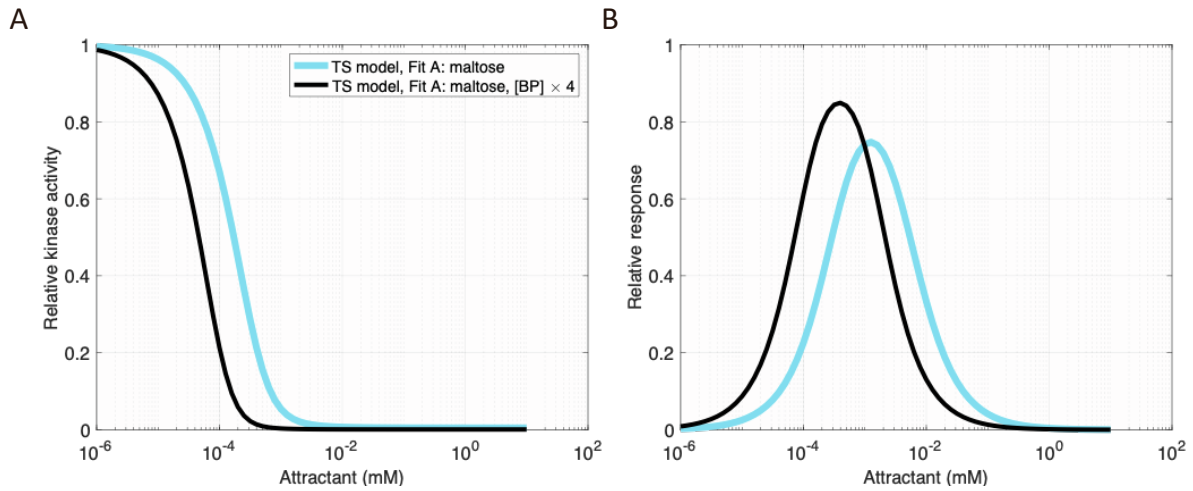

249

250 **Figure S11: Modifying binding-protein abundance for Fit A of transport-and-sensing model**  
 251 **to FRET data.** Fit A of the transport-and-sensing model (Figure S10) predicts a binding-protein  
 252 abundance that is a factor of ten lower than previous literature estimates. However, the finding  
 253 from the FRET assays that increased binding-protein expression increases chemotactic  
 254 sensitivity supports our hypothesis that binding-protein abundance was low for the strain and  
 255 culture conditions of the FRET assays: our model predicts that, in this regime of low binding-  
 256 protein abundance, chemotactic sensitivity increases with binding protein abundance.

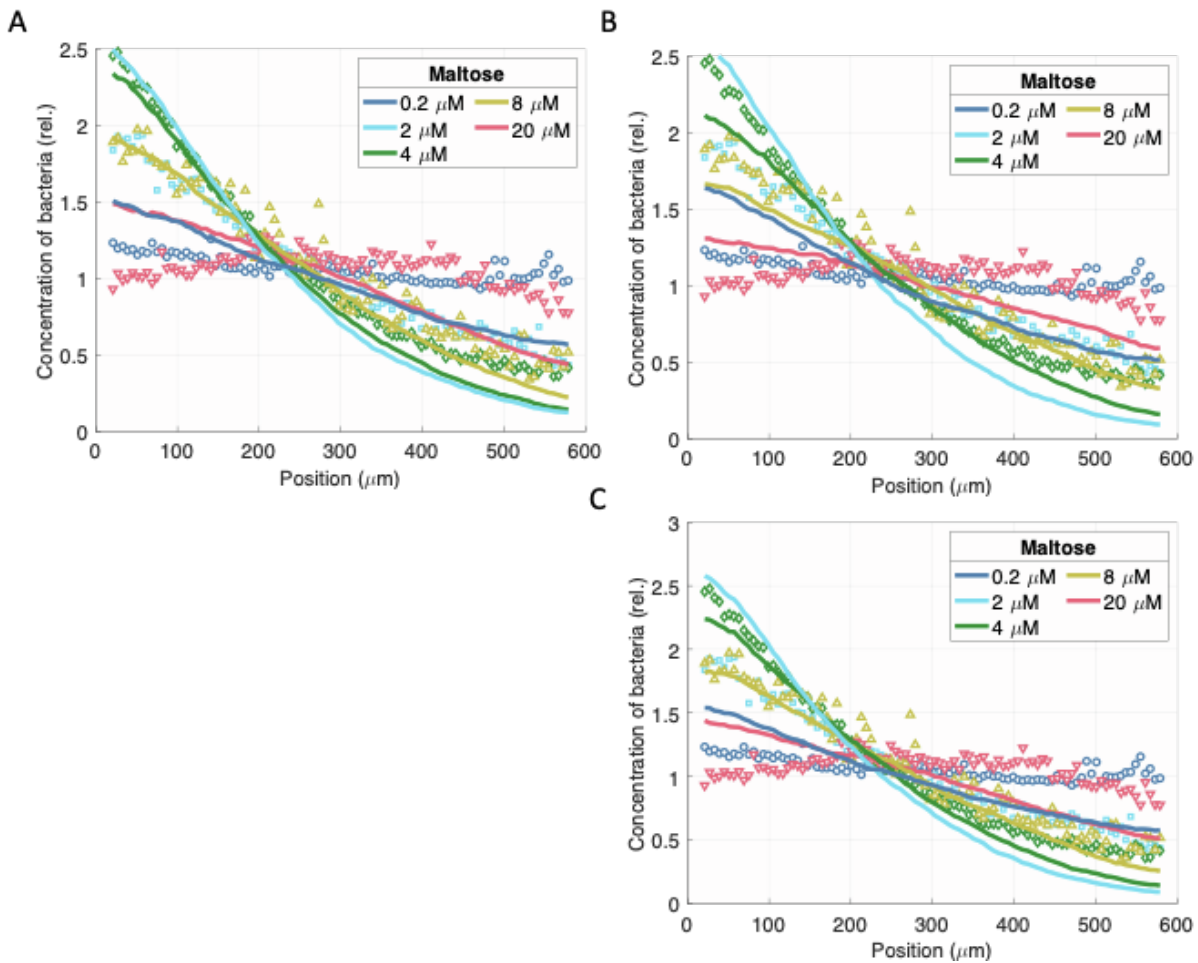

258

259 **Figure S12: Predicted steady-state distributions of cells in maltose gradients using SPECS**

260 **simulator with fits using FRET activity level assays.** (A) Experimental cell distributions shown with

261 predictions from SPECS simulator incorporated with indirect-binding model and using parameters from

262 fitted FRET data:  $n_{\text{Tar}} = 4$ ,  $K_{\text{BP}} = 2 \mu\text{M}$ ,  $K_{\text{I,Mal}}/[\text{BP}] = 0.4$ ,  $K_{\text{A,Mal}}/[\text{BP}] = 6$ , and  $p_0 = 0.1$  (Neumann, et

263 al. 2010). Same experimental cell distributions shown with predictions from SPECS simulator

264 incorporated with transport-and-sensing model and using Fit A (B) or Fit B (C) obtained from fitting

265 FRET data (Figure S10) with  $n_{\text{Tar}} = 4$ .
